# Supplementary material for: The Arabidopsis Proteins AtNHR2A and AtNHR2B Are Multi-Functional Proteins Integrating Plant Immunity With Other Biological Processes
Source: Front Plant Sci. 2020 Mar 4;11:232. doi: 10.3389/fpls.2020.00232 (PMC7064621; doi:10.3389/fpls.2020.00232)
Supplement: Supplementary file 2 [file Table_1.XLSX]

## Sheet: AtNHR2A interactors 1st Screen 
Supplementary Table 1. Mass spectrometry analysis of AtNHR2A interactors
Proteins interacting with AtNHR2A (on bead digeston)
#		Gene ID	Description	Protein molecular weight (Da)	Protein identification probability	Exclusive unique peptide count	Exclusive unique spectrum count	Total spectrum count	Peptide sequence	Best Peptide identification probability
	Bait	At4g25030	Arabidopsis thaliana nonhost resistance 2A (AtNHR2A)	36836.4	1	7	10	14	(K)AATISLSSFGSGGPFGFDAFSDMFK(N)	0.997
									(R)AGKGPIFEDGPNFDTAFR(L)
									(K)TAmVFTIAASVLGQVIGSR(A)
									(K)KLTLEVPNPSSVEADQmQFAGVSSDGR(C)
									(R)NINEPTNLSFSSSLPFPIPAR(A)
									(K)GPIFEDGPNFDTAFR(L)
									(K)GPIFEDGPNFDTAFR(L)
	Preys
1		At2g18450	Succinate dehydrogenase 1-2 (AtSDH1-2)	69364.3	0.99	2	2	2	(K)AVIELENYGLPFSR(T)	0.997
									(K)GSDWLGDQDAIQYMCR(E)
2		At2g18020	L8-type protein of large ribosomal subunit (AtRPL8A)	27858.8	0.99	2	2	2	(K)ATLVVGNVLPLR(S)	0.997
									(R)SIPEGAVVCNVEHHVGDR(G)
3		At1g09590	L21-type protein of large ribosomal subunit (AtRPL21A)	18652.8	0.97	2	2	2	(K)GYIPLSTYLR(T)	0.997
									(K)FYHGRTGRIWNVTK(R)
4		At1g30580	GTPase (AtENGD-1)	44472.8	0.99	2	2	2	(K)SEIPAFLEIHDIAGLVR(G)	0.997
									(R)FDWLCQTYK(P)
5		At5g26000	Thioglucoside glucohydrolase (AtBGLU38/AtTGG1)	51482.9	1	2	3	3	(K)GFIFGVASSAYQVEGGR(G)	0.997
									(R)EYVGDRLPEFSETEAALVK(G)
6		At2g43610	Class-IV chitinase-like protein	30000	0.982	2	2	2	(K)FLGLPLLKDPDMVAR(S)	0.987
									(R)SPTVAFQCAMWFWNK(N)
7		At2g10940	Proline-rich glycoprotein (AtPRP15)	29648.3	0.99	2	2	2	(K)LGACVDLLGGLVK(I)	0.997
									(K)GLVEVEAAACLCTTLK(L)
8		At1g17860	Kunitz-type peptide proteinase inhibitor	22081.9	0.998	2	2	2	(K)SLLTGVNYYILPVIR(G)	0.997
									(R)GVTTEAAVEPVK(D)
9		At2g43030	50S ribosomal protein L3-type (RPL3A)	29364.3	0.969	2	2	2	(K)LVFDEIFKEGDLVDVAGTTIGK(G)	0.991
									(R)LTNIEGFEPNQK(L)
10		At1g01560	Mitogen-activated protein kinase, MAPK (AtMPK11)	42477	0.951	2	2	2	(R)LITELIGSPDDSSLGFLR(S)	0.986
									(R)EPLFPGRDYVQQLR(L)
11		At1g58230	BEACH-B-type protein (AtBchB)	292784	0.975	2	2	2	(R)SLKHPSGSAVSK(L)	0.993
									(K)DGTCVFHTLRE
12		At3g54400	Putative aspartyl protease	45476.1	0.972	2	2	2	(R)SSLYYVNLVGIR(V)	0.992
									(K)SSNFSGSLRLGPK(N)
13		At5g64110	Class-III peroxidase (AtPer70)	36138.1	0.996	2	1	1	(R)GLLESDQVLWTNLETRPIVER(L)	0.994
									(R)VVLDTGSGDQFDTSYLNNLK(N)
14		At3g49010	60S L13-type protein of large ribosomal subunit (AtRPL13B)	23767.5	0.99	2	2	2	(K)AGDSTPEELANATQVQGDYLPIVRE	0.997
									(K)LVIFPRRARK(V)
15		At1g65980	Peroxiredoxin type 2 (AtPrxIIB)	17428.2	1	2	2	2	(K)VTVANVESGGEFTVSSADDILK(A)	0.997
									(R)FALLLDDLK(V)
16		At5g16400	F-type thioredoxin (AtTRX-F2)	19999.3	0.998	2	2	2	(K)YEDLLAAIEAAR(S)	0.997
									(K)IVVLDMYTQWCGPCK(V)
17		At4g36020	CSD-type RNA chaperone (AtCSP1)	30086.3	0.972	2	2	2	(R)SLTVGDAVEFAITQGSDGK(T)	0.992
									(K)AVNVTAPGGGSLKKE

## Sheet: AtNHR2A interactors 2nd screen
Supplementary Table 1; Mass spectrometry analysis of AtNHR2A interactors
Proteins interacting with AtNHR2A (in gel digestion)
#		Gene ID	Description	Protein molecular weight (Da)	Protein identification probability	Exclusive unique peptide count	Exclusive unique spectrum count	Total spectrum count	Peptide sequence	Best Peptide identification probability
	Bait	At4g25030	Arabidopsis thaliana nonhost resistance 2A (AtNHR2A)	36836.4	1	4	4	6	(K)AATISLSSFGSGGPFGFDAFSDMFK(N)	0.997
									(R)NINEPTNLSFSSSLPFPIPAR(A)
									(K)GPIFEDGPNFDTAFR(L)
									(R)AVSGVAPLVAK(I)
1	Preys	At5g38420	Small subunit of ribulose bisphosphate carboxylase (AtRBCS-2B/AtS2B)	20350.6	1	3	3	7	(K)KFETLSYLPDLSDVELAK(E)	0.997
									(K)LPLFGcTDSAQVLK(E)
									(K)EVDYLLR(N)
2		At4g15900	Core component of spliceosome-associated MAC complex (AtPRL1/AtMAC2)	53379.2	1	3	3	3	(K)TGQVPDPTSTDNPEFQIVLSIIKE	0.997
									(R)LYQMQQNGTLLFPAINVNDSVTK(S)
									(R)ATDVMIAGK(V)
3		At1g50740	Fatty acid transport protein (AtFAX5)	93891.9	1	4	4	4	(R)VIENANVIMATYEDPLLGDVQVYPEK(G)	0.997
									(R)YRVENLYEGPLDDQYANAIR(N)
									(R)QETVEDVPcGNTVAmVGLDQFITK(N)
									(K)GTVAFSAGLHGWAFTLTNFAKMYASK(F)
4		At3g19140	Day neutral flowering (AtDNF)	58985.8	1	4	4	4	(K)GITPYANLYHYDLPLALENK(Y)	0.997
									(R)VVAALGYDNGIFAPGR(C)
									(K)LGKPIGPR(A)
									(R)LIDYMVQK(G)
5		At1g39030	Protein of unknown function	47659.3	0.932	3	3	5	(K)GTmTTTHSYTGDQR(L)	0.993
									(K)IVDNETISVDGK(L)
									(K)VLDEEFGIVK(G)
6		At3g08150	AAC1	41477.3	0.998	3	3	3	(K)GFTNFALDFLmGGVSAAVSK(T)	0.997
									(K)TAAAPIER(V)
									(R)mLATTASPVFVQTPGEK(G)
7		At5g06740	Legume-lectin-type receptor-like protein kinase (AtLecRK-S.5)	29817.4	0.995	3	3	4	(K)GSFETIHIQDSTGHEFATR(L)	0.974
									(K)FDVGNVVMVTGGR(N)
									(R)LLYDTK(G)
8		At3g45080	Sulphotransferase (AtSOT6)	35019.9	1	3	3	5	(K)SKPETGEVIGVFESLQPSDTDLGAK(V)	0.997
									(K)GTGTANQcPTIDGGSETFSFK(A)
									(K)NTAASVGEITLK(I)
9		At4g04980	Protein of unknown function	24643.9	1	3	4	6	(K)VGGPPLPSGGLPGTDNSDQAR(D)	0.997
									(K)LFQTIDNLDYAAR(S)
									(K)SSPDAEKYYSETVSSLNNVLAK(L)
10		At1g07650	LRR-type receptor protein kinase (BSR650)	49503.4	1	3	3	3	(R)VETGMIKPGMVVTFAPTGLTTEVK(S)	0.985
									(K)MTPTKPMVVETFSEYPPLGR(F)
									(K)MDATTPK(Y)
11		At5g15700	Dual-targeted DNA-dependent RNA polymerase (AtRpoT2)	22061.1	1	2	2	4	(R)TLTSVHEAMLEDVAFPAEIVGK(R)	0.997
									(K)DVVFEYPVEA(-)
12		At5g61780	Ribonuclease TUDOR 2 (AtTSN2)	107743	0.95	2	2	2	(K)VSPYIAELEQLEEQAQQEGFGR(W)	0.947
									(K)VVVTEVLGGGR(F)
13		At4g02840	Nuclear Ribonucleoprotein SmD1b	12750.6	0.998	2	2	2	(R)YYILPDSLNLETLLVEDTPR(I)	0.997
									(K)IPAGR(G)
14		At2g14830	AtISTL1-like 10	43543.8	0.999	2	2	3	(K)NNEITAEEITERDEGALK(Y)	0.997
									(K)LYQPLYTK(R)
15		At1g03760	Prefoldin subunit	15027.2	0.998	2	2	3	(R)MSLGLPVAATVNcADNTGAK(N)	0.997
									(R)LPSAcVGDmVmATVK(K)
16		At5g35740	Endo-1,3-beta-glucosidase	20286.6	0.99	2	2	7	(K)KFETLSYLPDLTDVELAK(E)	0.984
									(K)LPLFGcTDSAQVLK(E)
17		At3g11430	Glycerol-3-phosphate acyltransferase (AtGPAT5)	16273	0.998	2	2	3	(K)ADRDESSPYAAMLAAQDVAQRC	0.996
									(K)VETVTLGPSVR€
18		At1g42950	40S ribosomal protein S7	21922.8	1	2	2	2	(K)GVELSELDEQVAQAFFDLENTNQELK(S)	0.997
									(R)TLTSVHEAILDDVVLPAEIVGKR(T)
19		At1g67090	Ribulose bisphosphate carboxylase small chain (RBCS1A)	10794.6	0.98	2	2	5	(K)FETLSYLPDLTDSELAKEVDYLIR(N)	0.997
									(K)EVDYLIR(N)
20		At2g45510	Cytochrome P450 monooxygenase (AtCYP704A2)	29232.6	1	2	2	2	(R)AITQYLAEEYSEKGEK(L)	0.997
									(K)ATTNVWLQVEGQQFDPNASK(L)
21		At1g59620	NB-ARC-type disease resistance protein	56141.5	0.997	2	2	2	(K)NYVDMDEYPVTTELQNRC	0.997
									(K)AEGKPYDKPNIVTGANVQVcWEK(F)
22		At2g26920	Ubiquitin-associated/translation elongation factor EF1B	27721.5	0.993	2	1	3	(K)SITDYGSPEQFLSQVNYLLGK(Q)	0.992
									(K)EIEYPGQVLR(F)
23		At2g23690	Putative HTH-type transcriptional regulator	11454.2	0.999	2	2	2	(K)LASVPSGGGGGVAVASATSGGGGGGGAPAAESK(K)	0.997
									(K)GKDLAELIAAGR(E)
24		At4g17370	GFO/IDH/MocA-type oxidoreductase	15615.6	0.99	2	2	2	(K)LVNYQHLMPTR(Y)	0.987
									(K)AVILLQGR(Y)
25		At3g53110	Putative DEAD-box RNA helicase (AtRH38/AtLOS4)	69242.4	0.974	2	2	2	(R)TPILVATDVAAR(G)	0.997
									(R)EVALRSFK(T)
26		At1g12220	R-type immune receptor (AtRPS5)	44445.8	0.997	2	2	2	(R)TGYTGEDGFEISVPDEHAVDLAK(A)	0.997
									(K)LYFGNFQILDINGSTCFLTR(T)
27		At1g78300	AtGRF2/AtGF14 omega (14-3-3 family)	29162.9	0.986	2	2	5	(K)LAEQAERYEEMVEFMEK(V)	0.997
									(K)VSAAVDGDELTVEER(N)
28		At1g52360	β subunit of coatomer (COP) adaptor complex	30771.2	0.85	2	2	2	(K)TYGFLTPEFWK(E)	0.992
									(K)VITEGEDQA(-)
29		At3g48240	Protein of unknown function, contains PB1-type signalling protein domain	20054	0.976	2	2	2	(K)NSLKFLCSY GGR(I)	0.718
									(K)LEE FCGYSVELKC
30		At4g36020	CSD-type RNA chaperone (AtCSP1)	30086.3	0.972	2	2	2	(R)SLTVGDAVEFAITQGSDGK(T)	0.992
									(K)AVNVTAPGGGSLKKE
31		ATCG00470	ATPase ε subunit	14499.3	1	2	2	2	(R)IGNNEITILVNDAEKNSDIDPQEAQQTLEIAEANLR(K)	0.997
									(K)NSDIDPQEAQQTLEIAEANLR(K)
32		At3g13810	putative C2H2-type subclass BIRD/IDD/IDZ transcription factor, WARBLER (AtIDD11/AtIDZ9)	63341.5	0.998	5	5	5	(R)GGYPILIIAEDIEQEALATLVVNK(L)	0.997
									(K)VVAAGANPVLITR(G)
									(R)IVNDGVTVAR(E)
									(R)KGVVTLEEGK(S)
									(K)EmTTIVGDGTTQEAVNKR(V)
33		At3g08510	putative phosphatidylinositol-specific phospholipase C (AtPLC2)	31194.7	0.998	4	4	5	(R)NAELDSEKR(L)	0.993
									(K)SPEYLDGSLVGDYGFDPFGLGKPAEYLQFDLDSLDQNLAK(N)
									(R)TEAVDPK(S)
									(K)STPFQPYSEVFGLQR(F)
34		At3g45140	Putative 13-lipoxygenase (AtLOX2)	102049	1	4	4	5	(R)YGGEFYVPRDEEFSTAK(G)	0.997
									(K)ALGEAQDDILQFDAPVLINR(D)
									(K)LDPAVYGDPTSLITWEIVER(E)
									(R)QTLAGLNPYSIQLVEEWPLISK(L)
35		At5g00570	Chlorophyll a-b binding protein	31140.7	0.97	4	4	4	(R)NAELDSEKR(L)	0.993
									(K)NLAGDVIGTR(T)
									(K)FFDPLGLAADPEK(T)
									(K)GPLNNWATHLSDPLHTTIIDTFSSS(-)
36		At3g08820	Protein of unknown function, contains pentatricopeptide (PPR) repeat	34133.4	0.998	4	4	4	(K)LcQLIDEYTQILVVAADNVGSTQLQNIR(K)	0.997
									(K)EVSEEVAK(Y)
									(K)FAVASVAAVSADAGGGAPAAAK(V)
									(K)FASGISMVTSLALAVSYPTLAAAPHmFINAYK(N)
37		At3g17280	F-box and associated interaction domains-containing protein	32158.2	0.979	2	2	2	(R)VLPADPFVINHPDEHLVSVEGWYSPEGIIQGIK(F)	0.986
									(K)IQLAAGIDGIQYVQFDYVK(N)
38		At2g20260	Subunit PsaE of photosystem I complex (AtPsaE2)	15189.4	1	2	2	3	(K)VNYANISTNNYALDEVEEVK	0.997
									(R)AAEDTPPATASSDSSSTTAAAAPAKVPAAK(A)
39		At2g44530	Phosphoribosyl diphosphate synthetase (AtPRS5)	18482.5	1	2	2	3	(R)ATTEVGEAPATTTEAETTELPEIVK(T)	0.997
									(K)STYKDILGSS(-)
40		At3g14580	protein of unknown function, contains pentatricopeptide (PPR) repeat	81817.3	0.998	2	2	2	(K)SALVTTAYDVENSGEPIEDLATGK(S)	0.997
									(K)LAGGAGMILANTAESGEELTADSHLVPATMVGAK(A)
41		At1g54010	GDSL-like Lipase/Acylhydrolase superfamily protein (AtGLL23)	43144	1	2	2	4	(R)GASFAVADATLLGAPVESLTLNQQVR(K)	0.997
									(K)NNPNADASTQQAFVTSVTNK(L)

## Sheet: AtNHR2A interactors 3rd screen
Supplementary Table 1; Mass spectrometry analysis of AtNHR2A interactors
Proteins interacting with AtNHR2A (in gel digestion)
#		Gene ID	Description	Protein molecular weight (Da)	Protein identification probability	Exclusive unique peptide count	Exclusive unique spectrum count	Total spectrum count	Peptide sequence	Best Peptide identification probability
	Bait	At4g25030	Arabidopsis thaliana nonhost resistance 2A (AtNHR2A)	36836.4	1	4	4	6	(K)AATISLSSFGSGGPFGFDAFSDMFK(N)	0.997
									(K)TAmVFTIAASVLGQVIGSR(A)
									(R)NINEPTNLSFSSSLPFPIPAR(A)
									(K)GPIFEDGPNFDTAFR(L)
1		At3g19140	Day neutral flowering (AtDNF)	58985.8	1	4	4	4	(K)GITPYANLYHYDLPLALENK(Y)	0.997
									(R)VVAALGYDNGIFAPGR(C)
									(K)LGKPIGPR(A)
									(R)LIDYMVQK(G)
2		At5g22580	Stress responsive A/B Barrel Domain-containing protein	41287.2	1	4	4	4	(K)AQEAMQSSGFDSEPVFNAAK(T)	0.997
									(R)LGTDSYNFSFAQVLSPSR(I)
									(K)TINQVQETGSSVFDATQR(V)
									(K)TVTDVAQQTSK(A)
3		ATMG01190	Protein of unknown function	55046.7	1	3	3	4	(R)EVAAFAQFGSDLDAATQALLNR(G)	0.997
									(R)LTEVLKQPQYAPLPIEK(Q)
									(R)TGSIVDVPAGK(A)
4		At4g44320	Protein of unknown function	42988.1	1	3	3	4	(K)GLVPLVGSNNESWcQGLDGLSSR(T)	0.997
									(R)YAAISQDSGLVPIVEPEILLDGEHDIDRTYDVAEK(V)
									(K)TWGGRPENVNAAQTTLLAR(A)
5		At1g07650	LRR-type receptor protein kinase (BSR650)	49503.4	1	3	3	3	(R)VETGMIKPGMVVTFAPTGLTTEVK(S)	0.985
									(K)MTPTKPMVVETFSEYPPLGR(F)
									(K)MDATTPK(Y)
6		At1g07590	protein of unknown function, contains pentatricopeptide (PPR) repeat	27562	0.999	3	3	3	(R)SGFEGAWTSNPLIFDNSYFKE	0.995
									(R)TGGPFGTMR(F)
									(K)LSELGFADA(-)
7		At2g33250	Protein of unknown function	47719.7	0.999	3	3	3	(K)VTAAVPSGASTGIYEALELR(D)	0.997
									(K)YGQDATNVGDEGGFAPNIQENKEGLELLK(T)
									(R)FTNKDIVAQIVSASIAGDIVK(A)
8		At5g38420	Small subunit of ribulose bisphosphate carboxylase (AtRBCS-2B/AtS2B)	20350.6	1	3	3	7	(K)KFETLSYLPDLSDVELAK(E)	0.997
									(K)LPLFGcTDSAQVLK(E)
									(K)EVDYLLR(N)
9		At5g02040	Prenylated RAB acceptor 1.A1 (AtPRA1.A1)	44722.4	0.999	2	2	3	(K)LNLPILPTTTIGSFPQTVELR(R)	0.997
									(K)AWYQTMISDSDYTEFDNFTK(W)
10		At1g60950	Ferredoxin (AtFd2)	20216.6	1	2	2	7	(K)KFETLSYLPDLTDSELAK(E)	0.997
									(K)FETLSYLPDLTDSELAKEVDYLIR(N)
11		At2g27100	SERRATE (AtSE)	74158.9	1	2	2	3	(R)AAEEIIFGDSEVTTGAVGDLQQITGLAR(Q)	0.997
									(R)TPGFSGADLANLLNEAAILAGR(R)
12		At1g74350	type-II-maturase-like intron splicing factor (AtnMat4)	42132.9	0.998	2	2	2	(R)VDLNVPLDDNSNITDDTR(I)	0.997
									(K)YLMGNGSR(V)
13		At5g48140	Polygalacturonase	83523.8	1	2	2	2	(R)TVAVIGPNSDVTETMIGNYAGK(A)	0.997
									(K)VTQQDLEDTYNVPFK(S)
14		At3g54590	Extensin-type glycoprotein (AtEXT2)	91483.3	0.998	2	2	3	(K)VAVEGQPETIAEDIESMVR(T)	0.997
									(R)EIQDETDRITGK(N)
15		At1g78860	Mannose-binding lectin protein (AtGAL2)	49195.3	0.998	2	2	2	(R)VVNEGGYTDYSPIEYNPDVR(G)	0.997
									(R)GFVPFSDNFR(L)
16		At5g65160	CC-TPR-type co-chaperone-like protein (AtTPR14)	15268.6	0.998	2	2	2	(R)FQSSAVAALQEAAEAYLVGLFEDTNLCAIHAKR	0.997
									(R)EIAQDFK(T)
17		At4g31570	AtAUCSIA 1	43360.5	1	2	2	2	(R)TETPLDVLVCNAAVYFPTAKE	0.997
									(K)GYVSETESGKR(L)
18		At3g53150	UDP-dependent glycosyl transferase (AtUGT73D1)	63813.9	0.992	2	2	3	(K)QIGVIGWGSQGPAQAQNLR(D)	0.987
									(R)MVSSSAVK(A)
19		At1g70440	Poly(ADP-ribose) polymerase (AtSRO3)	55593.6	0.997	2	2	3	(K)ETGDIYSTNEPQTAFNSR(I)	0.997
									(R)ISLQDVAQK(L)
20		ATCG00470	ATPase ε subunit	14499.3	1	2	2	2	(R)IGNNEITILVNDAEKNSDIDPQEAQQTLEIAEANLR(K)	0.997
									(K)NSDIDPQEAQQTLEIAEANLR(K)
21		ATCG00020	Photosystem II protein D1 (PSBA)	38937.6	0.997	2	2	4	(R)ETTENESANEGYR(F)	0.997
									(R)VINTWADIINR(A)
22		ATCG00780	50S ribosomal protein L14 (RPL14)	13582	0.998	2	3	3	MIQPQTYLNVADNSGARE	0.997
									(K)IVSLAPEVL
23		At5g14690	S4 RNA-binding domain-containing protein	23037.4	0.954	2	2	2	(R)DLLTLDEK(S)	0.94
									(K)HIDFALTSPFGGGRPGR(V)
24		At5g17640	Abiotic stress gene 1 (ASG1)	84358.4	0.995	2	2	3	(K)LNLPILPTTTIGSFPQTVELRR	0.992
									(K)GSDHRRATNVSAR(L)
25		At1g21400	2-oxoisovalerate dehydrogenase subunit α1	29547.7	0.988	2	2	2	(K)TVEEENQGVMDR(I)	0.986
									(K)IVEGDHVK(T)
26		At5g45410	Arabidopsis thaliana nonhost resistance 2B (AtNHR2B)	36467	1	2	2	2	(K)TAmALTIGASILGQVIGSR(A)	0.997
									(K)GPIFEDGPGFDSAFK(L)
27		At2g14830	AtIST1-like10	43543.8	0.999	2	2	3	(K)NNEITAEEITERDEGALK(Y)	0.997
									(K)LYQPLYTK(R)
28		At5g55180	Glycosyl hydrolase family 17 protein	80055.9	0.999	6	6	6	(K)SGDELTSLKDYVTR(M)	0.997
									(R)VFIMDNcEDIIPEYLGFVK(G)
									(R)KPEEINKEEYAAFYK(S)
									(K)TMEINPENSIMDELR(K)
									(K)GIVDSEDLPLNISR(E)
									(R)MKEGQNDIFYITGESK(K)
29		At3g08510	putative phosphatidylinositol-specific phospholipase C (AtPLC2)	31194.7	0.998	4	4	5	(R)NAELDSEKR(L)	0.993
									(K)SPEYLDGSLVGDYGFDPFGLGKPAEYLQFDLDSLDQNLAK(N)
									(R)TEAVDPK(S)
									(K)STPFQPYSEVFGLQR(F)
30		At5g00570	Chlorophyll a-b binding protein	31140.7	0.97	4	4	4	(R)NAELDSEKR(L)	0.993
									(K)NLAGDVIGTR(T)
									(K)FFDPLGLAADPEK(T)
									(K)GPLNNWATHLSDPLHTTIIDTFSSS(-)
31		At4g36300	Protein of unknown function	30275.2	1	3	3	3	(R)ISQEVSGDALGEEFKGYVFK(I)	0.99
									(K)ANSDAADYQK(L)
									(R)GcIVSPDLSVLNLVIVK(K)
32		At1g50100	Protein of unknown function	63809.3	1	3	3	3	(K)ETSTIVGDGSTQDAVK(K)	0.997
									(R)GGYPILIIAEDIEQEALATLVVNK(L)
									(K)TNDLAGDGTTTSVVLAQGFIAEGVK(V)
33		At2g04790	Protein of unknown function	108203	0.894	3	3	3	(R)VLLQDFTGVPAVVDLAcMR(D)	0.966
									(K)mRNGVTATDLVLTVTQmLR(K)
									(K)DAYcLLNFGDSITTDHISPAGNIQK(D)
34		At1g51030	Protein of unknown function	48528.9	1	2	2	4	(K)SGSLFDNVLVSDDPEYAK(K)	0.997
									(K)FGGDTPYSIMFGPDIcGYSTK(K)
35		At3g08100	Protein of unknown function	66124	0.999	2	3	4	(R)EDAQSIINSASSLLHR(N)	0.989
									(R)AHAFDVSDYPVVVTLEDHLTPDLQSK(V)
36		At4g13940	S-adenosyl-L-homocysteine hydrolase (AtSAHH1)	48407.7	0.998	2	1	2	(K)TGQVPDPTSTDNPEFQIVLSIIK(E)	0.997
									(K)SKFDNLYGcR(H)
37		At1g68850	Putative class-III peroxidase (AtPer11)	51838.8	1	2	2	2	(K)SIDAGDYDYAIAFQER(I)	0.997
									(R)VAVIGGGPAGGAAAETLAQGGIETILIER(K)
