# Supplementary material for: The Arabidopsis Proteins AtNHR2A and AtNHR2B Are Multi-Functional Proteins Integrating Plant Immunity With Other Biological Processes
Source: Front Plant Sci. 2020 Mar 4;11:232. doi: 10.3389/fpls.2020.00232 (PMC7064621; doi:10.3389/fpls.2020.00232)
Supplement: Supplementary file 3 [file Table_2.XLSX]

## Sheet: AtNHR2B interactors 1st screen
Supplementary Table 2. Mass spectrometry analysis of AtNHR2B interactors
Proteins interacting with AtNHR2B (on bead digestion)
#		Gene ID	Description	Protein molecular weight (Da)	Protein identification probability	Exclusive unique peptide count	Exclusive unique spectrum count	Total spectrum count	Peptide sequence	Best Peptide identification probability
	Bait	At5g45410	Arabidopsis thaliana nonhost resistance 2B (AtNHR2B)	36466.2	1	16	35	55	(K)AATISLSSFGSGGPFGFDAFSDMFK(N)	0.997
									(R)NINEPTNLSFSSSLPFPIPAR(A)
									(K)GPIFEDGPNFDTAFR(L)
									(R)LFHGQDGVVPLSDTAR(T)
									(R)TEAQKPVPVFHPLAAK(A)
									(K)AATISLSSFGSGGPFGFDAFSDmFK(N)
									(K)GGNHEAMGDEWLK(T)
									(K)TGnCPIAKSyRAVsGVAPLVAK(I)
									(R)AVSGVAPLVAK(I)
									(K)ILQPPPGmK(F)
									(K)cPQAIVTAR(A)
									(K)NLRPQPLPAK(V)
									(K)VLVIGmLGmALNVPLGVWR(E)
									(K)sVLmPKTAMVFTIAASVLGqVIGSR(A)
									(K)TAmVFTIAASVLGQVIGSR(A)
									(K)KLTLEVPNPSSVEADQmQFAGVSSDGR(C)
1	Preys	At4g25030	Arabidopsis thaliana nonhost resistance 2A (AtNHR2A)	36836.4	1	13	27	35	(K)VLVIGmLGmALNVPLGVWR(E)	0.997
									(R)NINEPTNLSFSSSLPFPIPAR(A)
									(K)GPIFEDGPNFDTAFR(L)
									(R)LFHGQDGVVPLSDTAR(T)
									(R)TEAQKPVPVFHPLAAK(A)
									(K)AATISLSSFGSGGPFGFDAFSDmFK(N)
									(K)GGNHEAMGDEWLK(T)
									(R)AVSGVAPLVAK(I)
									(K)cPQAIVTAR(A)
									(K)NLRPQPLPAK(V)
									(K)VLVIGmLGmALNVPLGVWR(E)
									(K)TAmVFTIAASVLGQVIGSR(A)
									(K)KLTLEVPNPSSVEADQmQFAGVSSDGR(C)
2		At3g46740	Translocon at the outer envelope membrane of chloroplasts, 75 kD (AtToc75-III)	89189.7	1	5	5	7	(K)SAEVSTEWSIVPGR(G)	0.997
									(R)GGAPTLASFQPGGSVTFEHR(N)
									(K)LEYVHPYLDGVYNPR(N)
									(R)TVFQVDQGLGIGSK(F)
									(R)AEYAVDHNNGTGALFFR(F)
3		At5g64940	ABC1-type atypical kinase (AtABC1K8/AtOSA1)	86026	0.999	4	4	4	(R)LAAIGEDLLAIAADQPFR(F)	0.997
									(K)INGDYnGSARLNGnGSAR(K)
									(R)KSVNGDFnGsAR(L)
									(R)KSVnGDFnGSARLNGnGsLVK(Y)
4		At1g23190	Phosphoglucomutase (AtPGM3)	63172	0.999	3	3	3	(R)SDVASVASADEFEYKDPVDGSISK(H)	0.996
									(K)ATGAFILTASHNPGGPTEDFGIK(Y)
									(R)SmPTSAALDVVAKsLnLK(F)
5		At5g12860	Plastidic 2-oxoglutarate/malate translocator (AtDiT1/AtpOMT1)	59216.3	0.998	3	3	3	(K)QTIGWTDWAK(A)	0.997
									(-)mASLALSGsCSLAFPLK(S)
									(K)LGVDAVTAAILGLSVLLVTGVVTWKEcLAESVAWDTLtWFAALIAmAGYLnK(Y)
6		At2g21390	α-subunit of coatomer (COP) adaptor complex	136470	1	3	3	3	(K)VVIFDLQQR(L)	0.997
									(R)TLDVPIYITK(V)
									(R)LSFLYLITGNLDK(L)
									(R)VFLSILQTIPLVVVESR(R)
									(K)LERERPAFALSGDSLFYAK(D)
									(R)TVqFHHENPWIVSASDDQTIR(I)
7		At3g16460	Putative jacalin-lectin like 2 (AtJAC2)	72473.6	1	2	2	4	(K)IYASYGGEGIQYVK(F)	0.997
									(K)NFGVDTVVTTLIFK(T)
									(K)KVyVGqGQDGVAAVKFEYK(N)
									(R)KVSVGQAQDGIGAVSFVYDK(A)
8		At5g45290	Protein of unknown function	60774.7	0.997	2	2	2	(R)SQVRALQRLGSR(F)	0.997
									(K)SLFCGLHSSCLAssstSHYSDDDNDEQVcnGWMRK(S)
9		At3g29320	Plastidial α-glucan phosphorylase (AtPHS1)	108588	0.993	2	2	2	(R)WIGGEDIVAVAYDVPIPGYK(T)	0.997
									(K)APSEDFDLSSK(Y)
10		At1g49970	CLP protease proteolytic subunit 1 (AtClpR1)	42629.1	0.998	2	2	2	(K)YLQAQAAIDYGIADK(I)	0.997
									(R)SSGAAIDmWIK(A)
11		At3g51820	Chlorophyll synthase (AtChlG)	41882.4	0.998	2	2	2	(K)SQTPDKAPAGGSSINQLLGIK(G)	0.997
									(R)RRSGFStLIYESPGR(R)
12		At4g34050	Caffeoyl coenzyme A O-methyltransferase 1 (AtCCoAOMT1)	29156.2	1	2	2	3	(K)SLLQSDDLYQYILETSVYPRE	0.997
									(R)EGPALPVLDEIVADEK(N)
13		At1g02780	L19-type protein of large ribosomal subunit (AtRPL19A)	24607.5	0.993	2	2	3	(K)VWLDPNESSDISMANSR(Q)	0.997
									(K)LVKDGFI IRKPK(T)
14		At5g19760	Mitochondrial adenine nucleotide transporter (AtDTC)	31913.3	0.998	2	2	2	(R)ISADEGVLALWK(G)	0.997
									(K)APIsVWTTVKPFVNGGASGMLATCVIqPIDMIKVRIqLGqGSAAsIttnmLK(N)
15		At1g45000	AtRPT4b	44757.7	0.998	2	2	2	(R)AIASNIDANFLK(V)	0.997
									(K)SLQSVGQIIGEVLRPLDNER(L)
16		At4g13760	Putative polygalacturonase	44215.2	0.988	2	2	2	(K)DLTIRDVIFNGTSDGIRIK(T)	0.986
									(K)ILVSnFLYEnIqmIDVGKPInIDQKYcPHPPcEHEQKGEsHVQIqnLK(L)
17		At5g35530	Ribosomal protein S3 family protein (AtRPS3C)	27458.2	0.993	2	2	2	(R)FKFPQDSVELYAEK(V)	0.997
									(K)FVADGVFYAELNEVLTRE
18		At5g41670	6-phosphogluconate dehydrogenase (AtPGD3)	53319	0.997	2	2	2	(K)NVGGLSNDELAEIFTEWNR(G)	0.997
									(-)MESVALsRIGLAGLAVmGqnLALnIADKGFPIsVynR(T)
19		At1g78630	L-13-type protein of large ribosomal subunit	26788.9	0.993	2	2	2	(K)ASDHVNTDKPWFVVDATDK(I)	0.997
									(R)LASTIANHIRGKNL(A)
20		At2g20580	RPN1-like regulatory component of 26S proteasome complex	98143.4	0.993	2	2	2	YIPLSPILEGFIILK	0.997
									(K)LMT VPSDSTTR(G)
21		At1g68680	Protein of unknown function	8351.6	0.988	2	2	2	(K)FLVPLIYAPALPLIR(L)	0.996
									(K)PVLRDRLFGLVLK(V)
22		At5g62790	1-Deoxy-d-xylulose 5-phosphate reductoisomerase (DXR)	51964.8	0.993	2	2	2	(K)LEIIPGEQGVIEVAR(H)	0.997
									(K)LEIIPG EQGVIEVAR(H)
23		At5g33320	Phosphoenolpyruvate/phosphate translocator (AtPPT1/AtCUE1)	44224.9	0.993	2	2	2	(K)FTPSYIQSAGVNVK(Q)	0.997
									(K)FT PSYIQSAGVK(N)
24		At5g16440	Isopentenyl diphosphate isomerase 1 (AtIDI1)	33214.4	0.993	2	2	2	(K)LFDELGIVAEDVPVDEFTPLGR(M)	0.997
									(K)LFDELGIVA EDVPR(V)
25		At2g18710	SECY homolog 1 (AtSCY1)	59495.6	0.993	2	2	2	(R)GVAAAIEDSSIDFGDFFK(G)	0.997
									(K)PSSGRGVA AAIEDSSR(I)
26		At1g22700	Protein Pale Yellow Green7 (AtPYG7)	33663.7	0.993	2	2	2	(K)ELPLALNAFEEVLLFDPNNK(V)	0.997
									(K)ISL QIHGRTLAR(I)
27		At3g27240	Cytochrome C1 family (AtCyc1-1)	33650.9	0.996	2	2	2	(R)EGLHYNPYFPGGAIAMPK(M)	0.997
									(R)DPPAGISIR(V)
28		At3g20000	Translocase of the outer mitochondrial membrane 40 (AtTOM40-1)	34251.2	1	2	2	2	(K)IDSNGVASALLEER(L)	0.997
									(R) LSMGLNFLLSR(A)
29		At1g74050	L6-type protein of 60S ribosomal subunit (AtRPL6C)	26107.7	1	2	2	2	(R)ASITPGTVLIILAGR(F)	0.997
									(K)QLASGLLLV TGPR(F)
30		At1g07770	S15A-type protein of small ribosomal subunit (AtRPS15aA)	14804.6	1	2	2	2	(K)HGYIGEFEYVDDHR(S)	0.997
									(K) IVVELNGRLN K(C)
31		At3g10860	Ubiquinone-binding component of cytochrome bc1 complex (AtUCR!-1/AtQCR8-1) UCRQ	8505	0.993	2	2	2	(K)AVVYALSPFQQK(I)	0.997
									(K)IMTGLWKDL PEK(I)
32		At3g07110	L19-type protein of large ribosomal subunit (AtRPL13aA)	23466.1	0.993	2	2	2	(K)DLLNGQNIVVVRC	0.997
									(K)IFWRTVR GMIPHK(T)
33		At2g09990	S16-type protein of 60S ribosomal subunit (AtRPL16A)	16632	0.993	2	2	2	(K)IFEPILLLGK(H)	0.997
									(K) HRFAGVNMR(I)
34		At1g41880	L35a-type protein of 60S ribosomal subunit (AtRPL35aB)	12798.9	0.993	2	2	2	(K)SNQYPNTSLIQIEGVNTQEEVNWYK(G)	0.997
									(K)VTRPHG NSGVVR(S)
35		At1g20010	β tubulin (AtTUB5)	50342.7	0.999	2	2	2	(R)YLTASAIFR(G)	0.997
									(K)LAVNLIPFPR(L)
36		At3g44110	DnaJ homolog 3 (J3)	46444.9	0.998	2	2	2	(K)ITFEGQADEAPDTVTGDIVFVLQQKE	0.997
									(K)AISDE GMPIYQRPFMK(G)
37		At3g54110	Mitochondrial uncoupling protein (AtPUMP1/AtUCP1)	32663.1	0.993	2	2	2	(R)NAIINAAELASYDQVKE	0.997
									(K)S RMMGDSGAYK(G)
38		At2g20530	Type-II prohibitin (AtPHB6)	31637.5	0.999	2	2	2	(K)AVVAQYNASQLITQRE	0.997
									(K)AVVAQ YNASQLITQRE
39		At4g26590	OPT-type transporter (AtOPT5)	84893.6	0.987	2	2	2	(K)LRLPGTNWSCSLNPGPFNMKEHVLITIFANTGAGGAYATSILTIVK(A)	0.985
									(K)FPFYTSHPFDHTGQR(Y)
40		At4g31990	Aspartate aminotransferase (AtASP5)	49832.9	0.993	2	2	2	(K)NHIPFFDVAYQGFASGSLDEDAASVR(L)	0.997
									(K)AEMEMMAGRIK(T)
41		At5g40100	TNL-type NLR pathogen effector recognition protein	115280	0.993	2	2	2	(K)FPLRFNTYCLVELNLR(H)	0.997
									(K)GCDSLEADDLEHFK(G)
42		At3g18000	N-carbamoylputrescine amidohydrolase (AtNMT1)	56104.3	0.993	2	2	2	(K)AGELIALDFIDNVIK(K)	0.997
									(K)VLISDYCRSPK(T)
43		At4g24190	Hsp90-type molecular chaperone (AtHSP90.7)	94208.5	0.998	2	2	2	(R)FLALTDKDVLGEGDTAK(L)	0.997
									(K)DIFLRELISNASDALDK(I)
44		At5g62200	Embryo-specific ATS3-like protein (AtATS3b)	21071.3	0.993	2	2	2	(R)DQISVAFGDGYGNQIYAPR(L)	0.997
									(R)DQISVAFGDGYGNQIYAPR(L)
45		At3g14240	Putative subtilisin-like serine protease	82585	0.993	2	2	2	(R)GPNPETPEILKPDVIAPGLNILAAWPDR(I)	0.997
									(K)HPTATIVFK(G)
46		At3g61870	Hypothetical protein 29B (HP29B)	27805.9	0.993	2	2	2	(K)QLKPTPVSPDGSTAVDSSSPPSTTELQIQR(L)	0.997
									(K)HFDAGSV LLGFGVLEAV FGGVNTYLR(T)
47		At5g38660	Acclimation of photosynthesis to environment (APE1)	31438.3	0.993	2	2	2	(R)IFQYGLGGGIPRR	0.997
									(K)FTSFFGPNITAEVGK(G)
48		At4g24750	Sulfurtransferases/rhodaneses	32114.7	0.993	2	2	2	(K)LAGIGGFSEFLGWTDQQR(A)	0.997
									RAQAAKEGWGYRLVYTAR(L)
49		At3g18700	Protein of unknown function	19880	0.989	2	2	2	(K)AVLVENEIGLK(F)	0.996
									(K)GEEYPCPSLPALPDTK(A)
50		At2g05310	Membrane protein of unknown function	13808	0.993	2	2	2	FITKDEEPEQYWQSVGER	0.997
									(K)DEEPEQYW QSVGERE
51		At3g02530	Protein of unknown function	58950.5	0.993	2	2	2	(R)VLVDGFEIAKR	0.997
									(K)FDVDTRLV EGLVLDHGSR(H)
52		At1g23980	ATL-RING-H2 E3 ubiquitin protein ligase	40764.4	0.993	2	2	2	(K)PTPVSPDGSTAVDSSSPPSTTELQ(I)	0.997
									(K)F PNNHPSETNLR (V)

## Sheet: AtNHR2B interactors 2nd screen
Supplementary Table 2. Mass spectrometry analysis of AtNHR2B interactors
Proteins interacting with AtNHR2B (in gel digestion)
#		Gene ID	Description	Protein molecular weight (Da)	Protein identification probability	Exclusive unique peptide count	Exclusive unique spectrum count	Total spectrum count	Peptide sequence	Best Peptide identification probability
	Bait	At5g45410	Arabidopsis thaliana nonhost resistance 2B (AtNHR2B)	36466.2	1	4	4	5	(R)NINEPTNLSFSSSLPFPIPAR(A)	0.997
									(K)GPIFEDGPNFDTAFR(L)
									(R)AVSGVAPLVAK(I)
									(K)ILQPPPGmK(F)
1	Preys	At3g15030	Transcription factor (AtTCP4)	40342.7	0.999	2	2	2	(K)MVYDYYASGAEDQWTLQENR(N)	0.997
									(K)AIALTVDTPRLGRR(E)
2		At1g72930	TNL-type NLR pathogen effector recognition protein (AtTN10)	20244.8	0.997	2	2	2	(R)SQVRALQRLGSR(F)	0.997
									(K)ELVRRSIRTFK(D)
3		At2g06160	Transposable element	85106.6	0.86	2	2	2	(K)KLADLNIK(I)	0.705
									(K)FFSNSRTARLRNEISGFTQK(Q)
4		At3g07030	(yeast POP6/7)-like component of RNA-dependent RNase P complex	49220.7	0.834	2	2	2	(K)GEMTGMVEEETTGMVEGEMTDMVEAETMDMGEEEADFVAVVVEAEMKDTVAAEVDMEVEVAAK(V)	0.621
									(K)DSPGYQAPAQSDQSK(P)
5		At5g47590	Protein of unknown function containing HSP20/α-crystallin domain	73260.9	0.806	2	2	2	(R)VANILMDMVPHDSGAYVALSNMYASQGNWSEVSEMRLR(M)	0.589
									(K)EIN SMLVEISDK(L)
6		At3g56410	Protein of unknown function	60755.7	0.997	2	2	2	(K)AEADEEVLQILELYRR	0.995
									(R)IYEEYLAVPVVK(G)
7		At1g51030	Protein of unknown function	48528.9	1	2	2	4	(K)SGSLFDNVLVSDDPEYAK(K)	0.997
									(K)FGGDTPYSIMFGPDIcGYSTK(K)
8		At3g08510	putative phosphatidylinositol-specific phospholipase C (AtPLC2)	31194.7	0.998	4	4	5	(R)NAELDSEKR(L)	0.993
									(K)SPEYLDGSLVGDYGFDPFGLGKPAEYLQFDLDSLDQNLAK(N)
									(R)TEAVDPK(S)
									(K)STPFQPYSEVFGLQR(F)
9		At1g54010	GDSL-like Lipase/Acylhydrolase superfamily protein (AtGLL23)	43144	1	2	2	4	(R)GASFAVADATLLGAPVESLTLNQQVR(K)	0.997
									(K)NNPNADASTQQAFVTSVTNK(L)
10		At3g17280	F-box and associated interaction domains-containing protein	32158.2	0.979	2	2	2	(R)VLPADPFVINHPDEHLVSVEGWYSPEGIIQGIK(F)	0.986
									(K)IQLAAGIDGIQYVQFDYVK(N)
11		At3g14580	protein of unknown function, contains pentatricopeptide (PPR) repeat	81817.3	0.998	2	2	2	(K)SALVTTAYDVENSGEPIEDLATGK(S)	0.997
									(K)LAGGAGMILANTAESGEELTADSHLVPATMVGAK(A)
12		At2g20260	Subunit PsaE of photosystem I complex (AtPsaE2)	15189.4	1	2	2	3	(K)VNYANISTNNYALDEVEEVK	0.997
									(R)AAEDTPPATASSDSSSTTAAAAPAKVPAAK(A)
13		At2g44530	Phosphoribosyl diphosphate synthetase (AtPRS5)	18482.5	1	2	2	3	(R)ATTEVGEAPATTTEAETTELPEIVK(T)	0.997
									(K)STYKDILGSS(-)
14		At3g08820	Protein of unknown function, contains pentatricopeptide (PPR) repeat	34133.4	0.998	4	4	4	(K)LcQLIDEYTQILVVAADNVGSTQLQNIR(K)	0.997
									(K)EVSEEVAK(Y)
									(K)FAVASVAAVSADAGGGAPAAAK(V)
									(K)FASGISMVTSLALAVSYPTLAAAPHmFINAYK(N)
15		At5g00570	Chlorophyll a-b binding protein	31140.7	0.97	4	4	4	(R)NAELDSEKR(L)	0.993
									(K)NLAGDVIGTR(T)
									(K)FFDPLGLAADPEK(T)
									(K)GPLNNWATHLSDPLHTTIIDTFSSS(-)
16		At3g13810	putative C2H2-type subclass BIRD/IDD/IDZ transcription factor, WARBLER (AtIDD11/AtIDZ9)	63341.5	0.998	5	5	5	(R)GGYPILIIAEDIEQEALATLVVNK(L)	0.997
									(K)VVAAGANPVLITR(G)
									(R)IVNDGVTVAR(E)
									(R)KGVVTLEEGK(S)
									(K)EmTTIVGDGTTQEAVNKR(V)
17		At3g45140	Putative 13-lipoxygenase (AtLOX2)	102049	1	4	4	5	(R)YGGEFYVPRDEEFSTAK(G)	0.997
									(K)ALGEAQDDILQFDAPVLINR(D)
									(K)LDPAVYGDPTSLITWEIVER(E)
									(R)QTLAGLNPYSIQLVEEWPLISK(L)
18		At3g08100	Protein of unknown function	66124	0.999	2	3	4	(R)EDAQSIINSASSLLHR(N)	0.989
									(R)AHAFDVSDYPVVVTLEDHLTPDLQSK(V)
19		At4g36300	Protein of unknown function	30275.2	1	3	3	3	(R)ISQEVSGDALGEEFKGYVFK(I)	0.99
									(K)ANSDAADYQK(L)
									(R)GcIVSPDLSVLNLVIVK(K)
20		At1g50100	Protein of unknown function	63809.3	1	3	3	3	(K)ETSTIVGDGSTQDAVK(K)	0.997
									(R)GGYPILIIAEDIEQEALATLVVNK(L)
									(K)TNDLAGDGTTTSVVLAQGFIAEGVK(V)
21		At2g04790	Protein of unknown function	108203	0.894	3	3	3	(R)VLLQDFTGVPAVVDLAcMR(D)	0.966
									(K)mRNGVTATDLVLTVTQmLR(K)
									(K)DAYcLLNFGDSITTDHISPAGNIQK(D)

## Sheet: AtNHR2B interactors 3rd screen
Supplementary Table 2. Mass spectrometry analysis of AtNHR2B interactors
Proteins interacting with AtNHR2B (in gel digestion)
#		Gene ID	Description	Protein molecular weight (Da)	Protein identification probability	Exclusive unique peptide count	Exclusive unique spectrum count	Total spectrum count	Peptide sequence	Best Peptide identification probability
	Bait	At5g45410	Arabidopsis thaliana nonhost resistance 2B (AtNHR2B)	36466.2	1	4	5	8	(R)NINEPTNLSFSSSLPFPIPAR(A)	0.997
									(K)VLVIGmLGmALNVPLGVWR(E)
									(K)sVLmPKTAMVFTIAASVLGqVIGSR(A)
									(K)TAmVFTIAASVLGQVIGSR(A)
1	Preys	At5g01530	Light harvesting complex photosystem II (AtLHCb4.1)	31140.7	1	3	3	4	(K)FFDPLGLAA DPEK(T)	0.997
									(K)FFDPLGLAA DPEK(T)
									(K)TAQLQLAEIK(H)
									(K)NLAGDVIGTR(T)
2		At5g07570	Glycine-rich protein	132779	0.861	3	3	3	(R)cFIADEmGLGK(T)	0.657
									(K)IVEScDDPGTETDVSNTIDLK(D)
									(R)LRPLPLEK(R)
3		At3g09960	Calcineurin-like famliy member	35084	0.883	2	2	5	TCNLAGVLQHGVHKITESDVNSNSALPASNQSMVATLLR	0.859
									(K)ITESDVNSNSALPASNQSMVATLLR(L)
4		At1g54820	Putative protein kinase	51873.6	0.859	2	2	2	(K)HGRMIFGMLWISDLLAIIVTPCVMHMHEAQEEPMK(L)	0.843
									(K)GVLSDGTVAAIK(L)
5		At1g07480	RNA polymerase TFIIa-transcription factor (AtTFIIa-L2)	16374	0.92	2	2	2	ISSLATIK	0.862
									(K)AMGIMNSFINDIFEK(L)
6		At2g27450	Nitrilase-like protein 1 (AtNLP1)	36456	0.846	2	2	2	VDSEAASMPIEYNTLSGDPSEWAESIYSKTGVIHIEEIR	0.829
									(K)LGL HLDREGEDPEK(V)
7		At1g08070	Protein of unknown function, contains pentatricopeptide (PPR) repeat	83510.8	0.998	2	2	2	(K)LCQLIDEYTQILVVAADNVGSTQLQNIR(K)	0.997
									(K)NLRVCRNCHEATK(L)
8		At5g47590	Protein of unknown function containing HSP20/α-crystallin domain	73260.9	0.806	2	2	2	(R)VANILMDMVPHDSGAYVALSNMYASQGNWSEVSEMRLR(M)	0.589
									(K)EIN SMLVEISDK(L)
9		At1g51030	Protein of unknown function	48528.9	1	2	2	4	(K)SGSLFDNVLVSDDPEYAK(K)	0.997
									(K)FGGDTPYSIMFGPDIcGYSTK(K)
10		At1g68850	putative class-III peroxidase (AtPer11)	51838.8	1	2	2	2	(K)SIDAGDYDYAIAFQER(I)	0.997
									(R)VAVIGGGPAGGAAAETLAQGGIETILIER(K)
11		At4g36300	Protein of unknown function	30275.2	1	3	3	3	(R)ISQEVSGDALGEEFKGYVFK(I)	0.99
									(K)ANSDAADYQK(L)
									(R)GcIVSPDLSVLNLVIVK(K)
12		At2g04790	Protein of unknown function	108203	0.894	3	3	3	(R)VLLQDFTGVPAVVDLAcMR(D)	0.966
									(K)mRNGVTATDLVLTVTQmLR(K)
									(K)DAYcLLNFGDSITTDHISPAGNIQK(D)
13		At4g13940	S-adenosyl-L-homocysteine hydrolase (AtSAHH1)	48407.7	0.998	2	1	2	(K)TGQVPDPTSTDNPEFQIVLSIIK(E)	0.997
									(K)SKFDNLYGcR(H)
14		At5g55180	Glycosyl hydrolase family 17 protein	80055.9	0.999	6	6	6	(K)SGDELTSLKDYVTR(M)	0.997
									(R)VFIMDNcEDIIPEYLGFVK(G)
									(R)KPEEINKEEYAAFYK(S)
									(K)TMEINPENSIMDELR(K)
									(K)GIVDSEDLPLNISR(E)
									(R)MKEGQNDIFYITGESK(K)
		At1g50100	Protein of unknown function	63809.3	1	3	3	3	(K)ETSTIVGDGSTQDAVK(K)	0.997
15									(R)GGYPILIIAEDIEQEALATLVVNK(L)
									(K)TNDLAGDGTTTSVVLAQGFIAEGVK(V)
