# Supplementary material for: The Arabidopsis Proteins AtNHR2A and AtNHR2B Are Multi-Functional Proteins Integrating Plant Immunity With Other Biological Processes
Source: Front Plant Sci. 2020 Mar 4;11:232. doi: 10.3389/fpls.2020.00232 (PMC7064621; doi:10.3389/fpls.2020.00232)
Supplement: Supplementary file 4 [file Table_3.XLSX]

## Sheet: AtNHR2A interactors 
Supplementary Table 3. Proteins interacting specifically with AtNHR2A or AtNHR2B, or with both AtNHR2A and AtNHR2B
Proteins specifically interacting with AtNHR2A from combined experiments
#		Gene ID	Description	Protein molecular weight (Da)	Protein identification probability	Exclusive unique peptide count	Exclusive unique spectrum count	Total spectrum count	Peptide sequence	Best Peptide identification probability
	Bait	At4g25030	Arabidopsis thaliana nonhost resistance 2A (AtNHR2A)	36836.4	1	7	10	14	(K)AATISLSSFGSGGPFGFDAFSDMFK(N)	0.997
									(R)AGKGPIFEDGPNFDTAFR(L)
									(K)TAmVFTIAASVLGQVIGSR(A)
									(K)KLTLEVPNPSSVEADQmQFAGVSSDGR(C)
									(R)NINEPTNLSFSSSLPFPIPAR(A)
									(K)GPIFEDGPNFDTAFR(L)
									(K)GPIFEDGPNFDTAFR(L)
1	Preys	At5g38420	Small subunit of ribulose bisphosphate carboxylase (AtRBCS-2B/AtS2B)	20350.6	1	3	3	7	(K)KFETLSYLPDLSDVELAK(E)	0.997
									(K)LPLFGcTDSAQVLK(E)
									(K)EVDYLLR(N)
2		At4g15900	Core component of spliceosome-associated MAC complex (AtPRL1/AtMAC2)	53379.2	1	3	3	3	(K)TGQVPDPTSTDNPEFQIVLSIIKE	0.997
									(R)LYQMQQNGTLLFPAINVNDSVTK(S)
									(R)ATDVMIAGK(V)
3		At5g38420	Small subunit of ribulose bisphosphate carboxylase (AtRBCS-2B/AtS2B)	20350.6	1	3	3	7	(K)KFETLSYLPDLSDVELAK(E)	0.997
									(K)LPLFGcTDSAQVLK(E)
									(K)EVDYLLR(N)
4		At1g50740	Fatty acid transport protein (AtFAX5)	93891.9	1	4	4	4	(R)VIENANVIMATYEDPLLGDVQVYPEK(G)	0.997
									(R)YRVENLYEGPLDDQYANAIR(N)
									(R)QETVEDVPcGNTVAmVGLDQFITK(N)
									(K)GTVAFSAGLHGWAFTLTNFAKMYASK(F)
5		At3g19140	Day neutral flowering (AtDNF)	58985.8	1	4	4	4	(K)GITPYANLYHYDLPLALENK(Y)	0.997
									(R)VVAALGYDNGIFAPGR(C)
									(K)LGKPIGPR(A)
									(R)LIDYMVQK(G)
6		At5g22580	Stress responsive A/B Barrel Domain-containing protein	41287.2	1	4	4	4	(K)AQEAMQSSGFDSEPVFNAAK(T)	0.997
									(R)LGTDSYNFSFAQVLSPSR(I)
									(K)TINQVQETGSSVFDATQR(V)
									(K)TVTDVAQQTSK(A)
7		ATMG01190	Protein of unknown function	55046.7	1	3	3	4	(R)EVAAFAQFGSDLDAATQALLNR(G)	0.997
									(R)LTEVLKQPQYAPLPIEK(Q)
									(R)TGSIVDVPAGK(A)
8		At4g44320	Protein of unknown function	42988.1	1	3	3	4	(K)GLVPLVGSNNESWcQGLDGLSSR(T)	0.997
									(R)YAAISQDSGLVPIVEPEILLDGEHDIDRTYDVAEK(V)
									(K)TWGGRPENVNAAQTTLLAR(A)
9		At1g39030	Protein of unknown function	47659.3	0.932	3	3	5	(K)GTmTTTHSYTGDQR(L)	0.993
									(K)IVDNETISVDGK(L)
									(K)VLDEEFGIVK(G)
10		At3g08150	AAC1	41477.3	0.998	3	3	3	(K)GFTNFALDFLmGGVSAAVSK(T)	0.997
									(K)TAAAPIER(V)
									(R)mLATTASPVFVQTPGEK(G)
11		At5g06740	Legume-lectin-type receptor-like protein kinase (AtLecRK-S.5)	29817.4	0.995	3	3	4	(K)GSFETIHIQDSTGHEFATR(L)	0.974
									(K)FDVGNVVMVTGGR(N)
									(R)LLYDTK(G)
12		At3g45080	Sulphotransferase (AtSOT6)	35019.9	1	3	3	5	(K)SKPETGEVIGVFESLQPSDTDLGAK(V)	0.997
									(K)GTGTANQcPTIDGGSETFSFK(A)
									(K)NTAASVGEITLK(I)
13		At4g04980	Protein of unknown function	24643.9	1	3	4	6	(K)VGGPPLPSGGLPGTDNSDQAR(D)	0.997
									(K)LFQTIDNLDYAAR(S)
									(K)SSPDAEKYYSETVSSLNNVLAK(L)
14		At1g07590	Protein of unknown function, contains pentatricopeptide (PPR) repeat	27562	0.999	3	3	3	(R)SGFEGAWTSNPLIFDNSYFKE	0.995
									(R)TGGPFGTMR(F)
									(K)LSELGFADA(-)
15		At2g33250	Protein of unknown function	47719.7	0.999	3	3	3	(K)VTAAVPSGASTGIYEALELR(D)	0.997
									(K)YGQDATNVGDEGGFAPNIQENKEGLELLK(T)
									(R)FTNKDIVAQIVSASIAGDIVK(A)
16		At1g07650	LRR-type receptor protein kinase (BSR650)	49503.4	1	3	3	3	(R)VETGMIKPGMVVTFAPTGLTTEVK(S)	0.985
									(K)MTPTKPMVVETFSEYPPLGR(F)
									(K)MDATTPK(Y)
17		At5g02040	Prenylated RAB acceptor 1.A1 (AtPRA1.A1)	44722.4	0.999	2	2	3	(K)LNLPILPTTTIGSFPQTVELR(R)	0.997
									(K)AWYQTMISDSDYTEFDNFTK(W)
		At1g60950	Ferredoxin (AtFd2)	20216.6	1	2	2	7	(K)KFETLSYLPDLTDSELAK(E)	0.997
18									(K)FETLSYLPDLTDSELAKEVDYLIR(N)
		At2g27100	SERRATE (AtSE)	74158.9	1	2	2	3	(R)AAEEIIFGDSEVTTGAVGDLQQITGLAR(Q)	0.997
									(R)TPGFSGADLANLLNEAAILAGR(R)
19
		At1g74350	Type-II-maturase-like intron splicing factor (AtnMat4)	42132.9	0.998	2	2	2	(R)VDLNVPLDDNSNITDDTR(I)	0.997
									(K)YLMGNGSR(V)
20		At2g18450	Succinate dehydrogenase 1-2 (AtSDH1-2)	69364.3	0.99	2	2	2	(K)AVIELENYGLPFSR(T)	0.997
									(K)GSDWLGDQDAIQYMCR(E)
21		At2g18020	L8-type protein of large ribosomal subunit (AtRPL8A)	27858.8	0.99	2	2	2	(K)ATLVVGNVLPLR(S)	0.997
									(R)SIPEGAVVCNVEHHVGDR(G)
22		At1g09590	L21-type protein of large ribosomal subunit (AtRPL21A)	18652.8	0.97	2	2	2	(K)GYIPLSTYLR(T)	0.997
									(K)FYHGRTGRIWNVTK(R)
23		At1g30580	GTPase (AtENGD-1)	44472.8	0.99	2	2	2	(K)SEIPAFLEIHDIAGLVR(G)	0.997
									(R)FDWLCQTYK(P)
24		At5g15700	Dual-targeted DNA-dependent RNA polymerase (AtRpoT2)	22061.1	1	2	2	4	(R)TLTSVHEAMLEDVAFPAEIVGK(R)	0.997
									(K)DVVFEYPVEA(-)
25		At5g61780	Ribonuclease TUDOR 2 (AtTSN2)	107743	0.95	2	2	2	(K)VSPYIAELEQLEEQAQQEGFGR(W)	0.947
									(K)VVVTEVLGGGR(F)
26		At4g02840	Nuclear Ribonucleoprotein SmD1b	12750.6	0.998	2	2	2	(R)YYILPDSLNLETLLVEDTPR(I)	0.997
									(K)IPAGR(G)
27		At2g14830	AtISTL1-like10	43543.8	0.999	2	2	3	(K)NNEITAEEITERDEGALK(Y)	0.997
									(K)LYQPLYTK(R)
28		At1g03760	Prefoldin subunit	15027.2	0.998	2	3	3	(R)MSLGLPVAATVNcADNTGAK(N)	0.997
									(R)LPSAcVGDmVmATVK(K)
29		At5g26000	Thioglucoside glucohydrolase (AtBGLU38/AtTGG1)	51482.9	1	2	3	3	(K)GFIFGVASSAYQVEGGR(G)	0.997
									(R)EYVGDRLPEFSETEAALVK(G)
30		At4g36020	CSD-type RNA chaperone (AtCSP1)	30086.3	0.972	2	2	2	(R)SLTVGDAVEFAITQGSDGK(T)	0.992
									(K)AVNVTAPGGGSLKKE
31		At2g43610	Class-IV chitinase-like protein	30000	0.982	2	2	2	(K)FLGLPLLKDPDMVAR(S)	0.987
									(R)SPTVAFQCAMWFWNK(N)
32		At2g10940	Proline-rich glycoprotein (AtPRP15)	29648.3	0.99	2	2	2	(K)LGACVDLLGGLVK(I)	0.997
									(K)GLVEVEAAACLCTTLK(L)
33		At5g35740	Endo-1,3-beta-glucosidase	20286.6	0.99	2	2	7	(K)KFETLSYLPDLTDVELAK(E)	0.984
									(K)LPLFGcTDSAQVLK(E)
34		At3g11430	Glycerol-3-phosphate acyltransferase (AtGPAT5)	16273	0.998	2	3	3	(K)ADRDESSPYAAMLAAQDVAQRC	0.996
									(K)VETVTLGPSVRE
35		At5g48140	Pectin Lyases	83523.8	1	2	2	2	(R)TVAVIGPNSDVTETMIGNYAGK(A)	0.997
									(K)VTQQDLEDTYNVPFK(S)
36		At3g54590	Extensin-type glycoprotein (AtEXT2)	91483.3	0.998	2	2	3	(K)VAVEGQPETIAEDIESMVR(T)	0.997
									(R)EIQDETDRITGK(N)
37		At1g78860	Mannose-binding lectin protein (AtGAL2)	49195.3	0.998	2	2	2	(R)VVNEGGYTDYSPIEYNPDVR(G)	0.997
									(R)GFVPFSDNFR(L)
38		At1g42950	40S ribosomal protein S7	21922.8	1	2	2	2	(K)GVELSELDEQVAQAFFDLENTNQELK(S)	0.997
									(R)TLTSVHEAILDDVVLPAEIVGKR(T)
39		At1g67090	Ribulose bisphosphate carboxylase small chain (RBCS1A)	10794.6	0.98	2	2	5	(K)FETLSYLPDLTDSELAKEVDYLIR(N)	0.997
									(K)EVDYLIR(N)
40		At5g65160	CC-TPR-type co-chaperone-like protein (AtTPR14)	15268.6	0.998	2	2	2	(R)FQSSAVAALQEAAEAYLVGLFEDTNLCAIHAKR	0.997
									(R)EIAQDFK(T)
41		At4g31570	AtAUCSIA 1	43360.5	1	2	2	2	(R)TETPLDVLVCNAAVYFPTAKE	0.997
									(K)GYVSETESGKR(L)
42		At2g45510	cytochrome P450 monooxygenase (AtCYP704A2)	29232.6	1	2	2	2	(R)AITQYLAEEYSEKGEK(L)	0.997
									(K)ATTNVWLQVEGQQFDPNASK(L)
43		At3g53150	UDP-dependent glycosyl transferase (AtUGT73D1)	63813.9	0.992	2	2	3	(K)QIGVIGWGSQGPAQAQNLR(D)	0.987
									(R)MVSSSAVK(A)
44		At1g17860	Kunitz-type peptide proteinase inhibitor	22081.9	0.998	2	2	2	(K)SLLTGVNYYILPVIR(G)	0.997
									(R)GVTTEAAVEPVK(D)
45		At1g59620	NB-ARC-type disease resistance protein	56141.5	0.997	2	2	2	(K)NYVDMDEYPVTTELQNRC	0.997
									(K)AEGKPYDKPNIVTGANVQVcWEK(F)
46		At1g70440	Poly(ADP-ribose) polymerase (AtSRO3)	55593.6	0.997	2	2	3	(K)ETGDIYSTNEPQTAFNSR(I)	0.997
									(R)ISLQDVAQK(L)
47		At2g26920	Ubiquitin-associated/translation elongation factor EF1B	27721.5	0.993	2	1	3	(K)SITDYGSPEQFLSQVNYLLGK(Q)	0.992
									(K)EIEYPGQVLR(F)
48		At2g23690	Putative HTH-type transcriptional regulator	11454.2	0.999	2	2	2	(K)LASVPSGGGGGVAVASATSGGGGGGGAPAAESK(K)	0.997
									(K)GKDLAELIAAGR(E)
49		At4g17370	GFO/IDH/MocA-type oxidoreductase	15615.6	0.99	2	2	2	(K)LVNYQHLMPTR(Y)	0.987
									(K)AVILLQGR(Y)
50		ATCGOO470	ATPase ε subunit	14499.3	1	2	2	2	(R)IGNNEITILVNDAEKNSDIDPQEAQQTLEIAEANLR(K)	0.997
									(K)NSDIDPQEAQQTLEIAEANLR(K)
51		ATCG00020	Photosystem II protein D1 (PSBA)	38937.6	0.997	2	2	4	(R)ETTENESANEGYR(F)	0.997
									(R)VINTWADIINR(A)
52		ATCG00780	50S Ribosomal protein L14 (RPL14)	13582	0.998	2	3	3	MIQPQTYLNVADNSGARE	0.997
									(K)IVSLAPEVL
53		At5g14690	S4 RNA-binding domain-containing protein	23037.4	0.954	2	2	2	(R)DLLTLDEK(S)	0.94
									(K)HIDFALTSPFGGGRPGR(V)
54		At2g43030	50S ribosomal protein L3-type (RPL3A)	29364.3	0.969	2	2	2	(K)LVFDEIFKEGDLVDVAGTTIGK(G)	0.991
									(R)LTNIEGFEPNQK(L)
55		At3g53110	Putative DEAD-box RNA helicase (AtRH38/AtLOS4)	69242.4	0.974	2	2	2	(R)TPILVATDVAAR(G)	0.997
									(R)EVALRSFK(T)
56		At1g12220	R-type immune receptor (AtRPS5)	44445.8	0.997	2	2	2	(R)TGYTGEDGFEISVPDEHAVDLAK(A)	0.997
									(K)LYFGNFQILDINGSTCFLTR(T)
57		At1g78300	AtGFP2/AtGF14 Ω (14-3-3)	29162.9	0.986	2	2	5	(K)LAEQAERYEEMVEFMEK(V)	0.997
									(K)VSAAVDGDELTVEER(N)
58		At5g17640	Abiotic stress gene 1 (ASG1)	84358.4	0.995	2	2	3	(K)LNLPILPTTTIGSFPQTVELRR	0.992
									(K)GSDHRRATNVSAR(L)
59		At1g01560	Mitogen-activated protein kinase, MAPK (AtMPK11)	42477	0.951	2	2	2	(R)LITELIGSPDDSSLGFLR(S)	0.986
									(R)EPLFPGRDYVQQLR(L)
60		At1g21400	2-oxoisovalerate dehydrogenase ubunit α1	29547.7	0.988	2	2	2	(K)TVEEENQGVMDR(I)	0.986
									(K)IVEGDHVK(T)
61		At1g52360	β2 subunit of coatomer (COP) adaptor complex	30771.2	0.85	2	2	2	(K)TYGFLTPEFWK(E)	0.992
									(K)VITEGEDQA(-)
62		At5g45410	Arabidopsis thaliana nonhost resistance 2B (AtNHR2B)	36467	1	2	2	2	(K)TAmALTIGASILGQVIGSR(A)	0.997
									(K)GPIFEDGPGFDSAFK(L)
63		At1g58230	BEACH-B-type protein (AtBchB)	292784	0.975	2	2	2	(R)SLKHPSGSAVSK(L)	0.993
									(K)DGTCVFHTLRE
64		At3g54400	Putative aspartyl protease	45476.1	0.972	2	2	2	(R)SSLYYVNLVGIR(V)	0.992
									(K)SSNFSGSLRLGPK(N)
65		At5g64110	Class-III peroxidase (AtPer70)	36138.1	0.996	2	1	1	(R)GLLESDQVLWTNLETRPIVER(L)	0.994
									(R)VVLDTGSGDQFDTSYLNNLK(N)
66		At3g48240	Protein of unknown function, contains PB1-type signalling protein domain	20054	0.976	2	2	2	(K)NSLKFLCSY GGR(I)	0.718
									(K)LEE FCGYSVELKC
67		At3g49010	60S L13-type protein of large ribosomal subunit (AtRPL13B)	23767.5	0.99	2	2	2	(K)AGDSTPEELANATQVQGDYLPIVRE	0.997
									(K)LVIFPRRARK(V)
68		At1g65980	Peroxiredoxin type 2 (AtPrxIIB)	17428.2	1	2	2	2	(K)VTVANVESGGEFTVSSADDILK(A)	0.997
									(R)FALLLDDLK(V)
69		At5g16400	F-type thioredoxin (AtTRX-F2)	19999.3	0.998	2	2	2	(K)YEDLLAAIEAAR(S)	0.997
									(K)IVVLDMYTQWCGPCK(V)

## Sheet: AtNHR2B interactors
Proteins specifically interacting with AtNHR2B from combined experiments
#		Gene ID	Description	Protein molecular weight (Da)	Protein identification probability	Exclusive unique peptide count	Exclusive unique spectrum count	Total spectrum count	Peptide sequence	Best Peptide identification probability
	Bait	At5g45410	Arabidopsis thaliana nonhost resistance 2B (AtNHR2B)	36466.2	1	16	35	55	(K)AATISLSSFGSGGPFGFDAFSDMFK(N)	0.997
									(R)NINEPTNLSFSSSLPFPIPAR(A)
									(K)GPIFEDGPNFDTAFR(L)
									(R)LFHGQDGVVPLSDTAR(T)
									(R)TEAQKPVPVFHPLAAK(A)
									(K)AATISLSSFGSGGPFGFDAFSDmFK(N)
									(K)GGNHEAMGDEWLK(T)
									(K)TGnCPIAKSyRAVsGVAPLVAK(I)
									(R)AVSGVAPLVAK(I)
									(K)ILQPPPGmK(F)
									(K)cPQAIVTAR(A)
									(K)NLRPQPLPAK(V)
									(K)VLVIGmLGmALNVPLGVWR(E)
									(K)sVLmPKTAMVFTIAASVLGqVIGSR(A)
									(K)TAmVFTIAASVLGQVIGSR(A)
									(K)KLTLEVPNPSSVEADQmQFAGVSSDGR(C)
1	Preys	At4g25030	Arabidopsis thaliana nonhost resistance 2A (AtNHR2A)	36836.4	1	13	27	35	(K)VLVIGmLGmALNVPLGVWR(E)	0.997
									(R)NINEPTNLSFSSSLPFPIPAR(A)
									(K)GPIFEDGPNFDTAFR(L)
									(R)LFHGQDGVVPLSDTAR(T)
									(R)TEAQKPVPVFHPLAAK(A)
									(K)AATISLSSFGSGGPFGFDAFSDmFK(N)
									(K)GGNHEAMGDEWLK(T)
									(R)AVSGVAPLVAK(I)
									(K)cPQAIVTAR(A)
									(K)NLRPQPLPAK(V)
									(K)VLVIGmLGmALNVPLGVWR(E)
									(K)TAmVFTIAASVLGQVIGSR(A)
									(K)KLTLEVPNPSSVEADQmQFAGVSSDGR(C)
2		At3g46740	Translocon at the outer envelope membrane of chloroplasts, 75 kD (AtToc75-III)	89189.7	1	5	5	7	(K)SAEVSTEWSIVPGR(G)	0.997
									(R)GGAPTLASFQPGGSVTFEHR(N)
									(K)LEYVHPYLDGVYNPR(N)
									(R)TVFQVDQGLGIGSK(F)
									(R)AEYAVDHNNGTGALFFR(F)
3		At5g64940	ABC1-type atypical kinase (AtABC1K8/AtOSA1)	86026	0.999	4	4	4	(R)LAAIGEDLLAIAADQPFR(F)	0.997
									(K)INGDYnGSARLNGnGSAR(K)
									(R)KSVNGDFnGsAR(L)
									(R)KSVnGDFnGSARLNGnGsLVK(Y)
4		At1g23190	Putative Phosphoglucomutase (AtPGM3)	63172	0.999	3	3	3	(R)SDVASVASADEFEYKDPVDGSISK(H)	0.996
									(K)ATGAFILTASHNPGGPTEDFGIK(Y)
									(R)SmPTSAALDVVAKsLnLK(F)
5		At5g12860	Plastidic 2-oxoglutarate/malate translocator (AtDiT1/AtpOMT1)	59216.3	0.998	3	3	3	(K)QTIGWTDWAK(A)	0.997
									(-)mASLALSGsCSLAFPLK(S)
									(K)LGVDAVTAAILGLSVLLVTGVVTWKEcLAESVAWDTLtWFAALIAmAGYLnK(Y)
6		At2g21390	α subunit of coatomer (COP) adaptor complex	136470	1	3	3	3	(K)VVIFDLQQR(L)	0.997
									(R)TLDVPIYITK(V)
									(R)LSFLYLITGNLDK(L)
									(R)VFLSILQTIPLVVVESR(R)
									(K)LERERPAFALSGDSLFYAK(D)
									(R)TVqFHHENPWIVSASDDQTIR(I)
7		At3g16460	Putative jacalin-lectin like 2 (AtJAC2)	72473.6	1	2	2	4	(K)IYASYGGEGIQYVK(F)	0.997
									(K)NFGVDTVVTTLIFK(T)
									(K)KVyVGqGQDGVAAVKFEYK(N)
									(R)KVSVGQAQDGIGAVSFVYDK(A)
8		At5g01530	Light harvesting complex photosystem II (AtLHCb4.1)	31140.7	1	3	3	4	(K)FFDPLGLAA DPEK(T)	0.997
									(K)FFDPLGLAA DPEK(T)
									(K)TAQLQLAEIK(H)
									(K)NLAGDVIGTR(T)
9		At5g07570	Glycine-rich protein	132779	0.861	3	3	3	(R)cFIADEmGLGK(T)	0.657
									(K)IVEScDDPGTETDVSNTIDLK(D)
									(R)LRPLPLEK(R)
10		At5g45290	Protein of unknown function	60774.7	0.997	2	2	2	(R)SQVRALQRLGSR(F)	0.997
									(K)SLFCGLHSSCLAssstSHYSDDDNDEQVcnGWMRK(S)
11		At3g29320	Plastidial alpha-glucan phosphorylase (AtPHS1)	108588	0.993	2	2	2	(R)WIGGEDIVAVAYDVPIPGYK(T)	0.997
									(K)APSEDFDLSSK(Y)
12		At1g49970	CLP protease proteolytic subunit 1 (AtClpR1)	42629.1	0.998	2	2	2	(K)YLQAQAAIDYGIADK(I)	0.997
									(R)SSGAAIDmWIK(A)
13		At3g51820	Chlorophyll synthase (AtChlG)	41882.4	0.998	2	2	2	(K)SQTPDKAPAGGSSINQLLGIK(G)	0.997
									(R)RRSGFStLIYESPGR(R)
14		At4g34050	Caffeoyl coenzyme A O-methyltransferase 1 (AtCCoAOMT1)	29156.2	1	2	2	3	(K)SLLQSDDLYQYILETSVYPRE	0.997
									(R)EGPALPVLDEIVADEK(N)
15		At1g02780	60S ribosomal protein L19-type (AtRPL19A)	24607.5	0.993	2	2	3	(K)VWLDPNESSDISMANSR(Q)	0.997
									(K)LVKDGFI IRKPK(T)
16		At5g19760	Mitochondrial adenine nucleotide transporter (AtDTC)	31913.3	0.998	2	2	2	(R)ISADEGVLALWK(G)	0.997
									(K)APIsVWTTVKPFVNGGASGMLATCVIqPIDMIKVRIqLGqGSAAsIttnmLK(N)
17		At1g45000	AtRPT4b	44757.7	0.998	2	2	2	(R)AIASNIDANFLK(V)	0.997
									(K)SLQSVGQIIGEVLRPLDNER(L)
18		At4g13760	Putative polygalacturonase	44215.2	0.988	2	2	2	(K)DLTIRDVIFNGTSDGIRIK(T)	0.986
									(K)ILVSnFLYEnIqmIDVGKPInIDQKYcPHPPcEHEQKGEsHVQIqnLK(L)
19		At5g35530	40S ribosomal protein S3 type (AtRPS3C)	27458.2	0.993	2	2	2	(R)FKFPQDSVELYAEK(V)	0.997
									(K)FVADGVFYAELNEVLTRE
20		At5g41670	6-phosphogluconate dehydrogenase (AtPGD3)	53319	0.997	2	2	2	(K)NVGGLSNDELAEIFTEWNR(G)	0.997
									MESVALsRIGLAGLAVmGqnLALnIADKGFPIsVynR(T)
21		At1g78630	50S ribosomal protein L13-type	26788.9	0.993	2	2	2	(K)ASDHVNTDKPWFVVDATDK(I)	0.997
									(R)LASTIANHIRGKNL(A)
22		At2g20580	RPN1-like regulatory component of 26S proteasome complex	98143.4	0.993	2	2	2	YIPLSPILEGFIILK	0.997
									(K)LMT VPSDSTTR(G)
23		At1g23980	Putative ATL-RING-H2 E3 ubiquitin protein ligase	40764.4	0.993	2	2	2	(K)PTPVSPDGSTAVDSSSPPSTTELQ(I)	0.997
									(K)F PNNHPSETNLR (V)
24		At1g68680	Protein of unknown function	8351.6	0.988	2	2	2	(K)FLVPLIYAPALPLIR(L)	0.996
									(K)PVLRDRLFGLVLK(V)
25		At5g62790	1-Deoxy-d-xylulose 5-phosphate reductoisomerase (DXR)	51964.8	0.993	2	2	2	(K)LEIIPGEQGVIEVAR(H)	0.997
									(K)LEIIPG EQGVIEVAR(H)
26		At5g33320	Phosphoenolpyruvate/phosphate translocator (AtPPT1/AtCUE1)	44224.9	0.993	2	2	2	(K)FTPSYIQSAGVNVK(Q)	0.997
									(K)FT PSYIQSAGVK(N)
27		At5g16440	Isopentenyl diphosphate isomerase 1 (AtIDI1)	33214.4	0.993	2	2	2	(K)LFDELGIVAEDVPVDEFTPLGR(M)	0.997
									(K)LFDELGIVA EDVPR(V)
28		At2g18710	SECY homolog 1 (AtSCY1)	59495.6	0.993	2	2	2	(R)GVAAAIEDSSIDFGDFFK(G)	0.997
									(K)PSSGRGVA AAIEDSSR(I)
29		At1g22700	Protein Pale Yellow Green7 (AtPYG7)	33663.7	0.993	2	2	2	(K)ELPLALNAFEEVLLFDPNNK(V)	0.997
									(K)ISL QIHGRTLAR(I)
30		At3g27240	Cytochrome C1 family (AtCyc1-1)	33650.9	0.996	2	2	2	(R)EGLHYNPYFPGGAIAMPK(M)	0.997
									(R)DPPAGISIR(V)
31		At3g20000	Translocase of the outer mitochondrial membrane 40 (AtTOM40-1)	34251.2	1	2	2	2	(K)IDSNGVASALLEER(L)	0.997
									(R) LSMGLNFLLSR(A)
32		At1g74050	60S ribosomal protein L6-type (AtRPL6C)	26107.7	1	2	2	2	(R)ASITPGTVLIILAGR(F)	0.997
									(K)QLASGLLLV TGPR(F)
33		At1g07770	40S ribosomal protein S15a-1 (AtRPS15aA)	14804.6	1	2	2	2	(K)HGYIGEFEYVDDHR(S)	0.997
									(K) IVVELNGRLN K(C)
34		At3g10860	Ubiquinone-binding component of cytochrome bc1 complex (AtUCR!-1/AtQCR8-1) UCRQ	8505	0.993	2	2	2	(K)AVVYALSPFQQK(I)	0.997
									(K)IMTGLWKDL PEK(I)
35		At3g07110	Ribosomal protein L19-type (AtRPL13aA)	23466.1	0.993	2	2	2	(K)DLLNGQNIVVVRC	0.997
									(K)IFWRTVR GMIPHK(T)
36		At2g09990	40S ribosomal protein S16-type(AtRPL16A)	16632	0.993	2	2	2	(K)IFEPILLLGK(H)	0.997
									(K) HRFAGVNMR(I)
37		At1g41880	60S ribosomal protein L35a-type (AtRPL35aB)	12798.9	0.993	2	2	2	(K)SNQYPNTSLIQIEGVNTQEEVNWYK(G)	0.997
									(K)VTRPHG NSGVVR(S)
38		At1g20010	β tubulin (AtTUB5)	50342.7	0.999	2	2	2	(R)YLTASAIFR(G)	0.997
									(K)LAVNLIPFPR(L)
39		At3g44110	DnaJ homolog 3 (J3)	46444.9	0.998	2	2	2	(K)ITFEGQADEAPDTVTGDIVFVLQQKE	0.997
									(K)AISDE GMPIYQRPFMK(G)
40		At3g15030	Transcription factor (AtTCP4)	40342.7	0.999	2	2	2	(K)MVYDYYASGAEDQWTLQENR(N)	0.997
									(K)AIALTVDTPRLGRR(E)
41		At1g72930	TNL-type NLR pathogen effector recognition protein (AtTN10)	20244.8	0.997	2	2	2	(R)SQVRALQRLGSR(F)	0.997
									(K)ELVRRSIRTFK(D)
42		At3g54110	Mitochondrial uncoupling protein (AtPUMP1/AtUCP1)	32663.1	0.993	2	2	2	(R)NAIINAAELASYDQVKE	0.997
									(K)S RMMGDSGAYK(G)
43		At2g20530	Type-II prohibitin (AtPHB6)	31637.5	0.999	2	2	2	(K)AVVAQYNASQLITQRE	0.997
									(K)AVVAQ YNASQLITQRE
44		At4g26590	OPT-type transporter (AtOPT5)	84893.6	0.987	2	2	2	(K)LRLPGTNWSCSLNPGPFNMKEHVLITIFANTGAGGAYATSILTIVK(A)	0.985
									(K)FPFYTSHPFDHTGQR(Y)
45		At4g31990	Aspartate aminotransferase (AtASP5)	49832.9	0.993	2	2	2	(K)NHIPFFDVAYQGFASGSLDEDAASVR(L)	0.997
									(K)AEMEMMAGRIK(T)
46		At5g40100	TNL-type NLR pathogen effector recognition protein	115280	0.993	2	2	2	(K)FPLRFNTYCLVELNLR(H)	0.997
									(K)GCDSLEADDLEHFK(G)
47		At3g18000	N-carbamoylputrescine amidohydrolase (AtNMT1)	56104.3	0.993	2	2	2	(K)AGELIALDFIDNVIK(K)	0.997
									(K)VLISDYCRSPK(T)
48		At4g24190	Sheperd (SHD)	94208.5	0.998	2	2	2	(R)FLALTDKDVLGEGDTAK(L)	0.997
									(K)DIFLRELISNASDALDK(I)
49		At5g62200	Embryo-specific ATS3-like protein (AtATS3b)	21071.3	0.993	2	2	2	(R)DQISVAFGDGYGNQIYAPR(L)	0.997
									(R)DQISVAFGDGYGNQIYAPR(L)
50		At3g09960	Tyrosine-protein phosphatase	35084	0.883	2	2	5	TCNLAGVLQHGVHKITESDVNSNSALPASNQSMVATLLR	0.859
									(K)ITESDVNSNSALPASNQSMVATLLR(L)
51		At3g14240	Putative subtilisin-like serine protease	82585	0.993	2	2	2	(R)GPNPETPEILKPDVIAPGLNILAAWPDR(I)	0.997
									(K)HPTATIVFK(G)
52		At3g61870	Hypothetical protein 29B (HP29B)	27805.9	0.993	2	2	2	(K)QLKPTPVSPDGSTAVDSSSPPSTTELQIQR(L)	0.997
									(K)HFDAGSV LLGFGVLEAV FGGVNTYLR(T)
53		At5g38660	Acclimation of photosynthesis to environment (APE1)	31438.3	0.993	2	2	2	(R)IFQYGLGGGIPRR	0.997
									(K)FTSFFGPNITAEVGK(G)
54		At4g24750	Sulfurtransferases/rhodaneses	32114.7	0.993	2	2	2	(K)LAGIGGFSEFLGWTDQQR(A)	0.997
									®AQAAKEGWGYRLVYTAR(L)
55		At2g06160	Transposable element	85106.6	0.86	2	2	2	(K)KLADLNIK(I)	0.705
									(K)FFSNSRTARLRNEISGFTQK(Q)
56		At1g54820	Putative protein kinase	51873.6	0.859	2	2	2	(K)HGRMIFGMLWISDLLAIIVTPCVMHMHEAQEEPMK(L)	0.843
									(K)GVLSDGTVAAIK(L)
57		At3g18700	Protein of unknown function	19880	0.989	2	2	2	(K)AVLVENEIGLK(F)	0.996
									(K)GEEYPCPSLPALPDTK(A)
58		At3g07030	(yeast POP6/7)-like component of RNA-dependent RNase P complex	49220.7	0.834	2	2	2	(K)GEMTGMVEEETTGMVEGEMTDMVEAETMDMGEEEADFVAVVVEAEMKDTVAAEVDMEVEVAAK(V)	0.621
									(K)DSPGYQAPAQSDQSK(P)
59		At1g07480	RNA polymerase TFIIa-transcription factor (AtTFIIa-L2)	16374	0.92	2	2	2	ISSLATIK	0.862
									(K)AMGIMNSFINDIFEK(L)
60		At2g05310	Membrane protein of unknown function	13808	0.993	2	2	2	FITKDEEPEQYWQSVGER	0.997
									(K)DEEPEQYW QSVGERE
61		At1g08070	Protein of unknown function, contains pentatricopeptide (PPR) repeat	83510.8	0.998	2	2	2	(K)LCQLIDEYTQILVVAADNVGSTQLQNIR(K)	0.997
									(K)NLRVCRNCHEATK(L)
62		At3g02530	Protein of unknown function	58950.5	0.993	2	2	2	(R)VLVDGFEIAKR	0.997
									(K)FDVDTRLV EGLVLDHGSR(H)
63		At2g27450	Nitrilase-like protein 1 (AtNLP1)	36456	0.846	2	2	2	VDSEAASMPIEYNTLSGDPSEWAESIYSKTGVIHIEEIR	0.829
									(K)LGL HLDREGEDPEK(V)
64		At5g47590	Protein of unknown function containing HSP20/α-crystallin domain	73260.9	0.806	2	2	2	(R)VANILMDMVPHDSGAYVALSNMYASQGNWSEVSEMRLR(M)	0.589
									(K)EIN SMLVEISDK(L)
65		At3g56410	Protein of unknown function	60755.7	0.997	2	2	2	(K)AEADEEVLQILELYRR	0.995
									(R)IYEEYLAVPVVK(G)

## Sheet: AtNHR2A and AtNHR2B interactors
Proteins interacting with AtNHR2A and AtNHR2B
#	Gene ID	Description	Protein molecular weight (Da)	Protein identification probability	Exclusive unique peptide count	Exclusive unique spectrum count	Total spectrum count	Peptide sequence	Best Peptide identification probability
1	At5g55180	Glycosyl hydrolase family 17 protein	80055.9	0.999	6	6	6	(K)SGDELTSLKDYVTR(M)	0.997
								(R)VFIMDNcEDIIPEYLGFVK(G)
								(R)KPEEINKEEYAAFYK(S)
								(K)TMEINPENSIMDELR(K)
								(K)GIVDSEDLPLNISR(E)
								(R)MKEGQNDIFYITGESK(K)
2	At3g13810	Putative C2H2-type subclass BIRD/IDD/IDZ transcription factor, WARBLER (AtIDD11/AtIDZ9)	63341.5	0.998	5	5	5	(R)GGYPILIIAEDIEQEALATLVVNK(L)	0.997
								(K)VVAAGANPVLITR(G)
								(R)IVNDGVTVAR(E)
								(R)KGVVTLEEGK(S)
								(K)EmTTIVGDGTTQEAVNKR(V)
3	At3g08510	Putative phosphatidylinositol-specific phospholipase C (AtPLC2)	31194.7	0.998	4	4	5	(R)NAELDSEKR(L)	0.993
								(K)SPEYLDGSLVGDYGFDPFGLGKPAEYLQFDLDSLDQNLAK(N)
								(R)TEAVDPK(S)
								(K)STPFQPYSEVFGLQR(F)
4	At3g45140	Putative 13-lipoxygenase (AtLOX2)	102049	1	4	4	5	(R)YGGEFYVPRDEEFSTAK(G)	0.997
								(K)ALGEAQDDILQFDAPVLINR(D)
								(K)LDPAVYGDPTSLITWEIVER(E)
								(R)QTLAGLNPYSIQLVEEWPLISK(L)
5	At5g00570	Chlorophyll a-b binding protein	31140.7	0.97	4	4	4	(R)NAELDSEKR(L)	0.993
								(K)NLAGDVIGTR(T)
								(K)FFDPLGLAADPEK(T)
								(K)GPLNNWATHLSDPLHTTIIDTFSSS(-)
6	At3g08820	Protein of unknown function, contains pentatricopeptide (PPR) repeat	34133.4	0.998	4	4	4	(K)LcQLIDEYTQILVVAADNVGSTQLQNIR(K)	0.997
								(K)EVSEEVAK(Y)
								(K)FAVASVAAVSADAGGGAPAAAK(V)
								(K)FASGISMVTSLALAVSYPTLAAAPHmFINAYK(N)
7	At4g36300	Protein of unknown function	30275.2	1	3	3	3	(R)ISQEVSGDALGEEFKGYVFK(I)	0.99
								(K)ANSDAADYQK(L)
								(R)GcIVSPDLSVLNLVIVK(K)
8	At1g50100	Protein of unknown function	63809.3	1	3	3	3	(K)ETSTIVGDGSTQDAVK(K)	0.997
								(R)GGYPILIIAEDIEQEALATLVVNK(L)
								(K)TNDLAGDGTTTSVVLAQGFIAEGVK(V)
9	At2g04790	Protein of unknown function	108203	0.894	3	3	3	(R)VLLQDFTGVPAVVDLAcMR(D)	0.966
								(K)mRNGVTATDLVLTVTQmLR(K)
								(K)DAYcLLNFGDSITTDHISPAGNIQK(D)
10	At1g51030	Protein of unknown function	48528.9	1	3	3	4	(K)SGSLFDNVLVSDDPEYAK(K)	0.997
								(K)FGGDTPYSIMFGPDIcGYSTK(K)
11	At3g08100	Protein of unknown function	66124	0.999	2	3	4	(R)EDAQSIINSASSLLHR(N)	0.989
								(R)AHAFDVSDYPVVVTLEDHLTPDLQSK(V)
12	At3g17280	F-box and associated interaction domains-containing protein	32158.2	0.979	2	2	2	(R)VLPADPFVINHPDEHLVSVEGWYSPEGIIQGIK(F)	0.986
								(K)IQLAAGIDGIQYVQFDYVK(N)
13	At2g20260	Subunit PsaE of photosystem I complex (AtPsaE2)	15189.4	1	2	2	3	(K)VNYANISTNNYALDEVEEVK	0.997
								(R)AAEDTPPATASSDSSSTTAAAAPAKVPAAK(A)
14	At2g44530	Phosphoribosyl diphosphate synthetase (AtPRS5)	18482.5	1	2	2	3	(R)ATTEVGEAPATTTEAETTELPEIVK(T)	0.997
								(K)STYKDILGSS
15	At3g08030	Cell wall associated protein	39065.7	0.99	2	1	1	(K)LEVKPGSLYALTFGASR(T)	0.997
								(R)NGNFEESPKK(T)
16	At1g54010	GDSL-like Lipase/Acylhydrolase superfamily protein (AtGLL23)	43144	1	2	2	4	(R)GASFAVADATLLGAPVESLTLNQQVR(K)	0.997
								(K)NNPNADASTQQAFVTSVTNK(L)
17	At4g13940	S-adenosyl-L-homocysteine hydrolase (AtSAHH1)	48407.7	0.998	2	1	2	(K)TGQVPDPTSTDNPEFQIVLSIIK(E)	0.997
								(K)SKFDNLYGcR(H)
18	At2g41475	Lectin AtATS3a	19949.9	0.986	2	1	1	(R)DKISISFGDVYGNEVYVKR	0.971
								(K)TSCSSVSYTR(D)
19	At1g68850	putative class-III peroxidase (AtPer11)	51838.8	1	2	2	2	(K)SIDAGDYDYAIAFQER(I)	0.997
								(R)VAVIGGGPAGGAAAETLAQGGIETILIER(K)
20	At3g14580	protein of unknown function, contains pentatricopeptide (PPR) repeat	81817.3	0.998	2	2	2	(K)SALVTTAYDVENSGEPIEDLATGK(S)	0.997
								(K)LAGGAGMILANTAESGEELTADSHLVPATMVGAK(A)
