# Supplementary material for: The Arabidopsis Proteins AtNHR2A and AtNHR2B Are Multi-Functional Proteins Integrating Plant Immunity With Other Biological Processes
Source: Front Plant Sci. 2020 Mar 4;11:232. doi: 10.3389/fpls.2020.00232 (PMC7064621; doi:10.3389/fpls.2020.00232)
Supplement: Supplementary file 5 [file Table_4.XLSX]

## Sheet: Sheet1
Supplementary Table 4. Proteins specifically interacting with AtNHR2A
Gene ID	Description	Subcellular location	Function	References
At1g01560	Mitogen-activated protein kinase, MAPK (AtMPK11)	Nucleus, Cytoplasm	Regulation of Plant immunity	(Carrasco et al., 2014; Eschen-Lippold et al., 2016)
At1g03760	Prefoldin subunit	Nucleus, cytoplasm	Protein folding	(Millan-Zambrano and Chavez, 2014)
At1g07590	protein of unknown function, contains pentatricopeptide (PPR) repeat	Unknown	Unknown
At1g07650	LRR-type receptor protein kinase (BSR650)	Plasma membrane	Brassinosteroid Signaling/ Plant immunity	(Xu et al., 2014)
At1g09590	L21-type protein of large ribosomal subunit (AtRPL21A)	Cytoplasm	Protein synthesis	(Carroll, 2013)
At1g12220	R-type immune receptor (AtRPS5)	Plasma membrane	Plant immunity	(Qi et al., 2012)
At1g17860	Kunitz-type peptide proteinase inhibitor	Unknown	Plant immunity	(Li et al., 2008)
At1g21400	2-oxoisovalerate dehydrogenase ubunit α1	Mitochondria	Branched chain amino acid cetabolism	(Fujiki et al., 2001)
At1g30580	GTPase (AtENGD-1)	Cytoplasm	Negative regulator of plant immunity	(Cheung et al., 2010)
At1g39030	Protein of unknown function	Unknown	Unknown
At1g42950	40S ribosomal protein S7	Cytoplasm	Protein synthesis	(Carroll, 2013)
At1g50740	Fatty acid transport protein (AtFAX5)	Unknown	Fatty acid transporter	(Li et al., 2015)
At1g52360	β2 subunit of coatomer (COP) adaptor complex	Golgi apparatus	Vesicle trafficking	(Brandizzi and Barlowe, 2013)
At1g58230	BEACH-B-type protein (AtBchB)	Unknown	Vacuolar protein trafficking/Plant immunity	(Teh et al., 2015)
At1g59620	NB-ARC-type disease resistance protein	Unknown	Plant Immunity	(van Ooijen et al., 2008)
At1g60950	Ferredoxin (AtFd2)	Chloroplast	Photosynthetic electron transport	(Hanke and Mulo, 2013)
At1g65980	Peroxiredoxin type 2 (AtPrxIIB)	Cytoplasm	Reactive oxygen species homeostasis	(Horling et al., 2002)
At1g67090	Ribulose bisphosphate carboxylase small chain (RBCS1A)	Chloroplast	Carbon fixatoin	(Vitlin Gruber and Feiz, 2018)
At1g70440	Poly(ADP-ribose) polymerase (AtSRO3)	Unknown	Unknown
At1g74350	Type-II-maturase-like intron splicing factor (AtnMat4)	Mitochondra, Chloroplast	RNA processing and maturation	(Keren et al., 2009; Cohen et al., 2014)
At1g78300	AtGFP2/AtGF14 Ω (14-3-3)	Mitochondria, Cytoplasm and Nucleus	Hormone signalling	(Yoon and Kieber, 2013)
At1g78860	Mannose-binding lectin protein (AtGAL2)	Extracellular space	Plant immunity	(Hwang and Hwang, 2011; Ghahremani et al., 2018)
At2g10940	Proline-rich glycoprotein (AtPRP15)	Extracellular space	Postranslational modification of cell wall proteins	(Durufle et al., 2017)
At2g14830	AtISTL1-like10	Endosomes	Vesicle trafficking	(Buono et al., 2016)
At2g18020	L8-type protein of large ribosomal subunit (AtRPL8A)	Cytoplasm	Protein synthesis	(Carroll, 2013)
At2g18450	Succinate dehydrogenase 1-2 (AtSDH1-2)	Mitochondria	Carbohydrate metabolism	(Figueroa et al., 2002)
At2g23690	Putative HTH-type transcriptional regulator	Unknown	Transcription	(Song et al., 2018)
At2g26920	Ubiquitin-associated/translation elongation factor EF1B	Unknown	Chlorophyll degradation	(Lin and Wu, 2004)
At2g27100	SERRATE (AtSE)	Nucleus	Alternative splicing	(Raczynska et al., 2014)
At2g33250	Protein of unknown function	Unknown	Unknown
At2g43030	50S ribosomal protein L3-type (RPL3A)	Chloroplast	Protein synthesis	(Kleffmann et al., 2004)
At2g43610	Class-IV chitinase-like protein	Extracellular space	Plant immunity	(Kumar et al., 2018)
At2g45510	Cytochrome P450 monooxygenase (AtCYP704A2)	Unknown	Synthesis of secondary metabolites	(Mizutani, 2012)
At3g08150	AAC1	Unknown	Unknown
At3g11430	Glycerol-3-phosphate acyltransferase (AtGPAT5)	Endoplasmic reticulumn	Glycerolipid synthesis	(Chen et al., 2011)
At3g19140	Day neutral flowering (AtDNF)	Plasma membrane	E3 ubiquitin ligase	(Morris et al., 2010)
At3g45080	Sulphotransferase (AtSOT6)	Unknown	Unkown
At3g48240	Protein of unknown function, contains PB1-type signalling protein domain	Unknown	Unkown
At3g49010	60S L13-type protein of large ribosomal subunit (AtRPL13B)	Cytoplasm	Protein synthesis	(Carroll, 2013)
At3g53110	Putative DEAD-box RNA helicase (AtRH38/AtLOS4)	Nucleus, cytoplasm	RNA metabolism	(Gong et al., 2002)
At3g53150	UDP-dependent glycosyl transferase (AtUGT73D1)	Unknown	Plant immunity	(Langlois-Meurinne et al., 2005)
At3g54400	Putative aspartyl protease	Extracellular space	Unknown	(Borderies et al., 2003)
At3g54590	Extensin-type glycoprotein (AtEXT2)	Extracellular space	Cell wall biosynthesis	(Liepman et al., 2010)
At3g56840	L2-hydroxyglutarate dehydrogenase (L2-HGDH)	Mitochondria	Mitochondrial metabolic repair	(Hudig et al., 2015)
At4g02840	Nuclear Ribonucleoprotein SmD1b	Nucleus	Splicing and RNA quality control	(Elvira-Matelot et al., 2016)
At4g04980	Protein of unknown function	Unknown	Unknown
At4g15900	Core component of spliceosome-associated MAC complex (AtPRL1/AtMAC2)	Nucleus	Regulation of plant immunity	(Palma et al., 2007)
At4g17370	GFO/IDH/MocA-type oxidoreductase	Unknown	Unkown
At4g31570	AtAUCSIA 1	Cytoplasm	Hormone homeostasis	(Molesini et al., 2012)
At4g36020	CSD-type RNA chaperone (AtCSP1)	Cytoplasm, Nucleus	RNA chaperone	(Kim et al., 2007; Yang and Karlson, 2013)
At4g44320	Protein of unknown function	Unknown	Unknown
At5g02040	Prenylated RAB acceptor 1.A1 (AtPRA1.A1)	Endoplasmic reticulumn	Vesicle trafficking- GTPase	(Alvim Kamei et al., 2008)
At5g06740	Legume-lectin-type receptor-like protein kinase (AtLecRK-S.5)	Plasma membrane	Plant Immunity	(Lannoo and Van Damme, 2014)
At5g14690	S4 RNA-binding domain-containing protein	Unknown	Unknown
At5g15700	Dual-targeted DNA-dependent RNA polymerase (AtRpoT2)	Mitochondria, Chloroplast	Transcription	(Hedtke et al., 2000)
At5g16400	F-type thioredoxin (AtTRX-F2)	Chloroplast	Redox regulation	(Cain et al., 2009)
At5g17640	Abiotic stress gene 1 (ASG1)	Plasma membrane	Abiotic stress responses	(Batelli et al., 2012)
At5g22580	Stress responsive A/B Barrel Domain-containing protein	Unknown	Unknown
At5g26000	Thioglucoside glucohydrolase (AtBGLU38/AtTGG1)	Cytoplasm	Indole glucosinolate biosynthesis	(Zhao et al., 2015)
At5g35740	Endo-1,3-beta-glucosidase	Extracellular space	Cell wall biosynthesis/ Plant immunity	(Houston et al., 2016)
At5g38420	Small subunit of ribulose bisphosphate carboxylase (AtRBCS-2B/AtS2B)	Chloroplast	Carbon fixation	(Vitlin Gruber and Feiz, 2018)
At5g48140	Polygalacturonase	Extracellular space	Cell wall biosynthesis/ Plant immunity	(Cao, 2012)
At5g61780	Ribonuclease TUDOR 2 (AtTSN2)	Cytoplasm	mRNA processing	(Frei dit Frey et al., 2010)
At5g64110	Class-III peroxidase (AtPer70)	Unknown	Unknown
At5g65160	CC-TPR-type co-chaperone-like protein (AtTPR14)	Unknown	Unknown
ATCGOO470	ATPase ε subunit	Chloroplast	ATP synthesis	(Friso et al., 2004)
ATCGOOO20	Photosystem II protein D1 (PSBA)	Chloroplast	ATP synthesis	(Friso et al., 2004)
ATCG00780	50S Ribosomal protein L14 (RPL14)	Chloroplast	Protein synthesis	(Kleffmann et al., 2004)
ATMG01190	ATP synthase subunit α (ATPA)	Mitochondria	ATP synthesis	(Kruft et al., 2001)
