# Supplementary material for: The Arabidopsis Proteins AtNHR2A and AtNHR2B Are Multi-Functional Proteins Integrating Plant Immunity With Other Biological Processes
Source: Front Plant Sci. 2020 Mar 4;11:232. doi: 10.3389/fpls.2020.00232 (PMC7064621; doi:10.3389/fpls.2020.00232)
Supplement: Supplementary file 6 [file Table_5.XLSX]

## Sheet: Sheet1
Supplementary Table 5. Proteins specifically interacting with AtNHR2B
Gene ID	Description	Subcellular location	Function	References
At1g02780	60S ribosomal protein L19-type (AtRPL19A)	Cytoplasm	Protein synthesis	(Carroll, 2013)
At1g07480	Putative RNA polymerase TFIIa-transcription factor (AtTFIIa-L2)	Unknown	Unknown
At1g07770	40S ribosomal protein S15a-1 (AtRPS15aA)	Cytoplasm	Protein synthesis	(Carroll, 2013)
At1g08070	Protein of unknown function, contains pentatricopeptide (PPR) repeat	Unknown	Unknown
At1g20010	β tubulin (AtTUB5)	Plasma membrane	Component of cytoskeleton	(Minami et al., 2009)
At1g22700	Protein Pale Yellow Green7 (AtPYG7)	Chloroplast	Photosystem biogenesis	(Yang et al., 2017)
At1g23190	Putative Phosphoglucomutase (AtPGM3)	Unknown	Unknown
At1g23980	Putative ATL-RING-H2 E3 ubiquitin protein ligase	Unknown	Unknown
At1g41880	60S ribosomal protein L35a-type (AtRPL35aB)	Cytoplasm	Protein synthesis	(Carroll, 2013)
At1g45000	AtRPT4b	Nucleus/Cytoplasm	Proteasome component	(Fu et al., 1999)
At1g49970	CLP protease proteolytic subunit 1 (AtClpR1)	Chloroplast	Protein degradation	(Koussevitzky et al., 2007)
At1g54820	Putative protein kinase	Unknown	Unknown
At1g68680	Protein of unknown function	Mitochondria	Component of respiratory complexes	(Meyer et al., 2008)
At1g72930	TNL-type NLR pathogen effector recognition protein (AtTN10)	Nucleus/Cytoplasm	Plant immunity	(Nandety et al., 2013)
At1g74050	60S ribosomal protein L6-type (AtRPL6C)	Cytoplasm	Protein synthesis	(Carroll, 2013)
At1g78630	50S ribosomal protein L13-type	Chloroplast	Protein synthesis	(Peltier et al., 2002)
At2g05310	Membrane protein of unknown function	Unknown	Unknown
At2g06160	Transposable element	Unknown	Unknown
At2g09990	40S ribosomal protein S16-type(AtRPL16A)	Cytoplasm	Protein synthesis	(Carroll, 2013)
At2g18710	SECY homolog 1 (AtSCY1)	Chloroplast	Protein translocator	(Skalitzky et al., 2011)
At2g20530	Type-II prohibitin (AtPHB6)	Mitochondria	Cell division	(Meyer et al., 2008)
At2g20580	RPN1-like regulatory component of 26S proteasome complex	Nucleus/Cytoplasm	Plant immunity	(Brukhin et al., 2005)
At2g21390	α subunit of coatomer (COP) adaptor complex	Golgi apparatus	Vesicle Trafficking	(Brandizzi and Barlow 2013)
At2g27450	Nitrilase-like protein 1 (AtNLP1)	Unknown	Unknown
At3g02530	Protein of unknown function	Unknown	Unkown
At3g07030	(yeast POP6/7)-like component of RNA-dependent RNase P complex	Unknown	Unknown
At3g07110	Ribosomal protein L19-type (AtRPL13aA)	Cytoplasm	Protein synthesis	(Carroll, 2013)
At3g09960	Tyrosine-protein phosphatase	Unknown	Abiotic stress	(Sottosanto et al., 2007)
At3g10860	Ubiquinone-binding component of cytochrome bc1 complex (AtUCR!-1/AtQCR8-1) UCRQ	Mitochondria	Subunit cytochrome bc1 complex/respiratoin	(Meyer et al., 2008)
At3g14240	Putative subtilisin-like serine protease	Unknown	Unknown
At3g15030	Transcription factor (AtTCP4)	Nucleus	Transcription	(Aggarwal et al., 2010)
At3g16460	Putative jacalin-lectin like 2 (AtJAC2)	Unknown	Unknown
At3g18000	N-carbamoylputrescine amidohydrolase (AtNMT1)	Unknown	Lipid metabolism	(Bolognese and McGraw, 2000)
At3g18700	Protein of unknown function	Unknown	Unknown
At3g20000	Translocase of the outer mitochondrial membrane 40 (AtTOM40-1)	Mitochondria	Component of the mitochondrial import apparatus	(Lister et al., 2004)
At3g27240	Cytochrome C1 family (AtCyc1-1)	Mitochondria	Component of the chytochrome C1 subunit	(Murcha et al., 2014)
At3g29320	Plastidial α-glucan phosphorylase (AtPHS1)	Chloroplast	Abiotic stress	(Zeeman et al., 2004)
At3g44110	DnaJ homolog 3 (J3)	Plasma membrane	Molecular chaperone	(Yang et al., 2010)
At3g46740	Translocon at the outer envelope membrane of chloroplasts, 75 kD (AtToc75-III)	Chloroplast	Protein translocation	(Baldwin et al., 2005)
At3g51820	Chlorophyll synthase (AtChlG)	Chloroplast	Chlorophyll biosynthesis	(Kim et al., 2013)
At3g54110	Mitochondrial uncoupling protein (AtPUMP1/AtUCP1)	Mitochondria	Mitochondrial transport	(Monne et al., 2018)
At3g56410	Protein of unknown function	Unknown	Unknown
At3g61870	Hypothetical protein 29B (HP29B)	Chloroplast	Unknown	(Ferro et al., 2002)
At4g13760	Putative polygalacturonase	Extracellular space	Cell wall remodeling	(Duan et al., 2016)
At4g24190	Sheperd (SHD)	Endoplasmic reticulum	Molecular chaperone	(Ishiguro et al., 2002)
At4g24750	Sulfurtransferases/rhodaneses	Unknown	Unkown	(Bauer et al., 2002)
At4g25030	Arabidopsis thaliana nonhost resistance 2A (AtNHR2A)	Chloroplast	Plant immunity	(Singh et al.,2018)
At4g26590	OPT-type transporter (AtOPT5)	Plasma membrane	oligopeptide transporter	(Lubkowitz, 2011)
At4g31990	Aspartate aminotransferase (AtASP5)	Chloroplast	Aspartate biosynthesis	(Wilkie et al., 1996)
At4g34050	Caffeoyl coenzyme A O-methyltransferase 1 (AtCCoAOMT1)	Cytoplasm	Lignin biosynthesis	(Liu et al., 2018)
At5g01530	Light harvesting complex photosystem II (AtLHCb4.1)	Chloroplast	Light-harvesting chlorophyll a/b binding protein	(de Bianchi et al., 2011)
At5g07570	Glycine-rich protein	Unknown	Unknown
At5g12860	Plastidic 2-oxoglutarate/malate translocator (AtDiT1/AtpOMT1)	Chloroplast	Oxaloacetate/malate transporter	(Kinoshita et al., 2011)
At5g16440	Isopentenyl diphosphate isomerase 1 (AtIDI1)	Chloroplasts	Isoprenoid biosynthesis	(Phillips et al., 2008)
At5g19760	Mitochondrial adenine nucleotide transporter (AtDTC)	Mitochondria	Mitochondrial dicarboxylate/tricarboxylate carrier	(Millar and Heazlewood, 2003)
At5g33320	Phosphoenolpyruvate/phosphate translocator (AtPPT1/AtCUE1)	Chloroplasts	Protein translocator	(Flugge et al., 2011)
At5g35530	40S ribosomal protein S3 type (AtRPS3C)	Cytoplasm	Protein synthesis	(Carroll, 2013)
At5g38660	Acclimation of photosynthesis to environment (APE1)	Chloroplast	Unknown	(Kleffmann et al., 2004)
At5g40100	TNL-type NLR pathogen effector recognition protein	Unknown	Disease resistance protein (TIR-NBS-LRR class) family	(McHale et al., 2006)
At5g41670	6-phosphogluconate dehydrogenase (AtPGD3)	Cytoplasm, Chloroplast	Carbohydrate metabolism	(Holscher et al., 2016)
At5g45290	Protein of unknown function	Unknown	Unknown
At5g47590	Protein of unknown function containing HSP20/α-crystallin domain	Unknown	Unknown
At5g62200	Embryo-specific ATS3-like protein (AtATS3b)	Unknown	Stomatal closure	(Van Hove et al., 2015)
At5g62790	1-Deoxy-d-xylulose 5-phosphate reductoisomerase (DXR)	Chloroplasts	Isoprenoid biosynthesis	(Carretero-Paulet et al., 2002)
At5g64940	ABC1-type atypical kinase (AtABC1K8/AtOSA1)	Chloroplast	Prenylquinone synthesis	(Manara et al., 2015)
