# Supplementary material for: The Arabidopsis Proteins AtNHR2A and AtNHR2B Are Multi-Functional Proteins Integrating Plant Immunity With Other Biological Processes
Source: Front Plant Sci. 2020 Mar 4;11:232. doi: 10.3389/fpls.2020.00232 (PMC7064621; doi:10.3389/fpls.2020.00232)
Supplement: Supplementary file 7 [file Table_6.XLSX]

## Sheet: Sheet1
Supplementary Table 6. Proteins interacting with AtNHR2A and AtNHR2B
Gene ID	Description	Subcellular location	Function	References
At1g50100	Protein of unknown function	Unknown	Unknown
At1g51030	Protein of unknown function	Unknown	Unknown
At1g54010	GDSL-like Lipase/Acylhydrolase superfamily protein (AtGLL23)	Endoplasmic Reticulum	Glucosinolate metabolism	(Jancowski et al., 2014)
At1g68850	Putative class-III peroxidase (AtPer11)	Unknown	Unknown
At2g04790	Protein of unknown function	Unknown	Unknown
At2g20260	Subunit PsaE of photosystem I complex (AtPsaE2)	Chloroplast	Photosynthesis	(Ihnatowicz et al., 2007)
At2g41475	Lectin AtATS3a	Unknown	Plant immunity	(Van Hove et al., 2015)
At2g44530	Phosphoribosyl diphosphate synthetase (AtPRS5)	Chloroplast	Pyrimidine photosynthesis	(Howles et al., 2006)
At3g08030	Cell wall associated protein	Extracellular space	Plant immunity	(Ndimba et al., 2003)
At3g08100	Protein of unknown function	Unknown	Unknown
At3g08510	Putative phosphatidylinositol-specific phospholipase C (AtPLC2)	Plasma membrane	Auxin biosynthesis and signaling	(Otterhag et al., 2001; Li et al., 2015)
At3g08820	Protein of unknown function, contains pentatricopeptide (PPR) repeat	Unkown	Unknown
At3g13810	Putative C2H2-type subclass BIRD/IDD/IDZ transcription factor WARBLER (AtIDD11/AtIDZ9)	Unknown	Unknown
At3g14580	Protein of unknown function, contains pentatricopeptide (PPR) repeat	Unknown	Unknown
At3g17280	F-box and associated interaction domains-containing protein	Unknown	Unknown
At3g45140	Putative 13-lipoxygenase (AtLOX2)	Chloroplast	Plant immunity	(Bell et al., 1995; Zoeller et al., 2012)
At4g13940	S-adenosyl-L-homocysteine hydrolase (AtSAHH1)	Nucleus	Methionine biosynthesis	(Lee et al., 2012)
At4g36300	Protein of unknown function	Unknown	Unknown
At5g00570	Chlorophyll a-b binding protein	Chloroplast	Photosynthesis	(Green et al., 1991)
At5g55180	Glycosyl hydrolase family 17 protein	Extracellular space	Plant immunity	(Zhang et al., 2007)
